## 1                                    **Cortical Hierarchy and The Dual Counterstream Architecture.**

2  
3    Julien Vezoli<sup>a§</sup>, Loïc Magrou<sup>b§</sup>, Xiao-Jing Wang<sup>c,\*</sup>, Kenneth Knoblauch<sup>b\*</sup>, Martin Vinck<sup>a\*</sup>,  
4    Henry Kennedy<sup>b,d\*#</sup>

5  
6  
7    <sup>a</sup> Ernst Strüngmann Institute (ESI) for Neuroscience in Cooperation with Max Planck Society,  
8    60528 Frankfurt, Germany

9    <sup>b</sup> Univ Lyon, Université Claude Bernard Lyon 1, Inserm, Stem Cell and Brain Research  
10    Institute U1208, 69500 Bron, France.

11    <sup>c</sup> Center for Neural Science, New York University (NYU), New York, NY 10003, USA.

12    <sup>d</sup> Institute of Neuroscience, State Key Laboratory of Neuroscience, Chinese Academy of  
13    Sciences (CAS) Key Laboratory of Primate Neurobiology, CAS, Shanghai 200031, China

14  
15    § equal contributing

16    \* equal contributing, senior authors

17    # corresponding author

### 18 19    **Abstract**

20    Hierarchy is a major organizational principle of the cortex and underscores modern  
21    computational theories of cortical function. Consideration of the role of the local microcircuit  
22    in the amplification of inputs, leads to the argument that distance dependent changes in the  
23    laminar profiles of connectivity constitute the structural signatures of hierarchy. Statistical  
24    modeling of these signatures demonstrates that inputs from multiple hierarchical levels to  
25    their target areas show remarkable consistency, allowing the construction of a cortical  
26    hierarchy based on a principle of hierarchical distance. The statistical modeling that is applied  
27    to structure can also be applied to laminar differences in the oscillatory coherence between  
28    areas thereby determining a functional hierarchy of the cortex. Close examination of the  
29    anatomy of inter-areal connectivity reveals a dual counterstream architecture with well-  
30    defined distance-dependent feedback and feedforward pathways in both the supra- and  
31    infragranular layers, suggesting a multiplicity of feedback pathways with well defined  
32    functional properties. These findings are consistent with feedback connections providing a  
33    generative network involved in a wide range of cognitive functions. A dynamical model  
34    constrained by connectivity data shed insights into the experimentally observed signatures of

35 frequency-dependent Granger causality for feedforward versus feedback signaling Exploring  
36 the laminar basis of inter-areal interactions, we suggest, can be achieved with concerted  
37 experiments capitalizing on recent technical advances in tract-tracing, high-resolution fMRI,  
38 optogenetics and mathematical modeling thereby allowing a much improved understanding of  
39 the computational properties of the cortex. However, because inter-areal interactions involve  
40 cortical layers that have been the target of important evolutionary changes in the primate and  
41 human lineage, their investigation will need to include interspecies comparisons.

42

### 43 **Keywords**

44 Non-human primate, human brain, electrophysiology, anatomy, modeling, connectivity

45

### 46 **Plan**

- 47 1. Introduction
- 48 2. Hierarchy – signatures of inputs to the local circuits.
- 49 3. Models of hierarchy
- 50 4. Hierarchy – input consistency
- 51 5. Dual stream architecture.
- 52 6. Functional characteristics of FF and FB pathways.
- 53 7. Diversity of FB pathways and their function in neural computations
- 54 8. Top down pathways constitute multiple generative networks?
- 55 9. Conclusion.

56

## 57 **1. Introduction**

58 Hierarchy as an organizational feature of the brain has been a recurrent theme since  
59 the evolutionary theory of neurological disorders of the neurologist John Hughlings Jackson  
60 (1835-1911), following his observations of positive and negative symptoms in his patients  
61 (York and Steinberg, 2011). The neurobiology of cortical hierarchy was explored by the  
62 pioneering work of David Hubel and Torsten Weisel when they characterized the receptive  
63 field properties of simple, complex and hypercomplex neurons across areas of the visual  
64 cortex (Hubel and Wiesel, 1962). Following the work of Rockland and Pandya (1979) a  
65 myriad of connectivity studies in the cortex found additional evidence of hierarchical  
66 organization, allowing Felleman and Van Essen to propose the first hierarchical model of the  
67 cortex (Felleman and Van Essen, 1991), thereby providing a framework for modern concepts  
68 of feedforward (FF) and feedback (FB) processes. The notion of hierarchy has become  
69 considerably generalized and for example can be considered to be the major concept linking  
70 biological and artificial intelligence (Hawkins and Blakeslee, 2004). Convolutional deep  
71 neural networks have a clear hierarchical organization, with convergent, FF connections  
72 passing information from lower to higher layers, and divergent FB connections shaping  
73 plasticity in the connections from lower layers (LeCun et al., 2015). But what exactly is the  
74 significance of hierarchy in the brain? Hierarchy has been extensively studied in terms of  
75 ranking of cortical areas with respect to a number of criteria including, gradients of structural  
76 and functional features, as a progression of scales or as a topological sequence of projections  
77 (Hilgetag and Goulas, 2020). Here we take a diametrically opposing view. Rather than simply  
78 considering hierarchy as a ranking of cortical areas, we address what it means in terms of  
79 monosynaptic inter-areal connectivity. In line with the tenet that the explanation of how the  
80 brain works demands an account of what neurons do, and that functional interactions of  
81 cortical areas is assured by neuronal activity relayed between areas by axons, we confine our  
82 discussion of hierarchy to the description of the neuronal properties of inter-areal relations. A  
83 critical aspect of these regularities concerns the spatial distances governing interactions  
84 between cortical neurons, which we and others have shown obey metabolic constraints in  
85 terms of wire minimization underlining the spatial embedding of the cortex (Markov et al.,  
86 2013). We propose that the structural and functional markers of hierarchy define the  
87 integration of long-range inputs into each local circuit. Future investigations of these markers  
88 are expected to provide insight into the cellular mechanisms underlying hierarchical  
89 processing.

90

## 91 **2. Hierarchy – signatures of inputs to local circuits.**

92 In 1989 Douglas, Martin and Whitteridge published a landmark study that proposed a  
93 canonical microcircuit for the neocortex (Douglas et al., 1989) (**Figure 1 and 9b**). A  
94 common misconception of the canonical microcircuit is that it constitutes solely a description  
95 of the inter-laminar wiring patterns of the cortex. In fact it is much more a theory that  
96 attempts to explain the electrophysiological properties of the cortex in terms of local  
97 connectivity particularly with respect to within-laminar connections. In an effort to nail down  
98 the transformation of the thalamic input, *in vivo* intracellular recordings were made in area V1  
99 in cat cortex. This showed that minute inputs from the LGN are amplified by recurrent  
100 excitation in layer 4 neurons (Latawiec et al., 2000). Subsequent quantification of the  
101 synaptic components of the local circuit showed that high levels of within-layer recurrent  
102 excitation is a characteristic feature of the local circuit (**Figure 1**) (Binzegger et al., 2009).  
103 These experiments showed that the role of inhibition was not to carve out the selectivity of  
104 the neuron response but rather to exert a control over the amplitude of the response and  
105 therefore to maximize the inhibitory potentials in the optimal receptive field response  
106 (Douglas et al., 1995; Douglas et al., 1989). Subsequent work showed that there is a weak  
107 orientation response in the input to the cortex, meaning that the primary role of the recurrent  
108 excitation is the amplification of a signal and not its creation (Ferster et al., 1996).

109 For many years research on cortex was predominantly in carnivores and non-human  
110 primates, leading to the notion of the cortical column as a fundamental component of  
111 functional organization (Mountcastle, 1995). In these studies, electrophysiological recordings  
112 from electrode penetrations made perpendicular to the cortex found a conserved function in  
113 the width of the cortex in passing from pia to white matter (Hubel and Wiesel, 1962;  
114 Mountcastle, 1957). In the visual system there were expectations that the columnar  
115 organization of the cortex would be both functional and structural, since physiologically  
116 demonstrated ocular-dominance columns seemed to co-localize with cortical territories  
117 labeled by transynaptic labeling following tracer injections in the eye (Hubel and Wiesel,  
118 1977). However, close examination revealed important discrepancies in such a  
119 correspondence (reviewed (da Costa and Martin, 2010)), suggesting that the link between  
120 cortical structure and function is to be found at a much finer scale. Thanks to work in the  
121 mouse visual cortex using the molecular tools that are available in this species, it has been  
122 confirmed that cortical responses to thalamic input are indeed the consequence of an  
123 amplification (Harris and Mrsic-Flogel, 2013) (Lien and Scanziani, 2013) via the local  
124 recurrent excitation (Cossell et al., 2015; Douglas et al., 1995; Ko et al., 2011). These studies

125 built on earlier findings of highly nonrandom features of synaptic connectivity in local  
126 cortical circuits, proposing that there is a skeleton of strong connections in a sea of weak  
127 connections (Song et al., 2005). Later it was shown that the rare strong connections in the  
128 lognormal distribution of synaptic weights are between neurons with similar receptive fields,  
129 meaning that neurons in the visual cortex listen most closely to a subset of their synaptic  
130 inputs (Cossell et al., 2015). These findings are most satisfying as they explain earlier  
131 observations showing that ongoing activity of a neuron (so called spontaneous activity)  
132 reflects the functional architecture (i.e. the backbone of strong connections) in which it is  
133 embedded (Tsodyks et al., 1999). The emerging picture is that layers 4, 3 and 2 neurons are  
134 organized into subnetworks so that the selectivity of the amplification is ensured by  
135 constraints at the scale of dendritic spines (Lee et al., 2016).

136 The principal wiring property of the canonical circuit is the recurrent excitation that is  
137 observed in all of the cortical layers including layer 4 (Binzegger et al., 2004). The relevance  
138 of the canonical microcircuit theory for understanding inter-areal processing became apparent  
139 when cortical connectivity was quantified. In fact, 80-90% of the connections of the cortex  
140 are in the local circuit spanning 1-2mm in the visual cortex (Markov et al., 2011). Except for  
141 the adjacent cortical area, the structural weight of the average input from a distant source area  
142 to a target area is several orders of magnitude *less* than the thalamic input (Markov et al.,  
143 2014a). These observations lead to the notion that amplification by local recurrent excitation  
144 is a general phenomenon, that allows selection and recombination of relatively small afferent  
145 signals (Douglas and Martin, 2007a, b). For instance, top-down signaling of selective  
146 attention multiplicatively modulates sets of sensory neurons (McAdams and Maunsell, 1999;  
147 Treue and Maunsell, 1996). In this manner, selective amplification by local circuit dynamics  
148 leads to all-or-none task switching (Ardid and Wang, 2013).

149 Early anatomists, working principally in non-human primates, distinguished between  
150 rostral directed connections that originate chiefly in the supragranular layers and terminate in  
151 layer 4 (Cragg, 1969; Kennedy and Bullier, 1985; Lund et al., 1975; Martinez-Millan and  
152 Hollander, 1975; Rockland and Pandya, 1979; Spatz et al., 1970; Van Essen and Zeki, 1978;  
153 Wong-Riley, 1978) and caudal directed connections that mostly originate from infragranular  
154 layers and terminate outside of layer 4 (Kaas and Lin, 1977; Kennedy and Bullier, 1985;  
155 Kuypers et al., 1965; Tigges et al., 1973; Wong-Riley, 1978). In a landmark study, Rockland  
156 and Pandya (Rockland and Pandya, 1979) were the first to formulate inter-areal connectivity  
157 in terms of hierarchy and suggested that the laminar organization of cortical afferents and  
158 their terminals indicates the sequence of information processing in cortex. These authors

159 proposed that connections originating from supragranular layers and terminating in layer 4 by  
160 analogy with the main thalamic input to cortex constitute the FF pathway channeling sensory  
161 information to cortical areas carrying out higher-order analyses. By contrast connections  
162 arising from the infragranular layers, by analogy with descending projections to subcortical  
163 structures, correspond to FB connections and were postulated to enable higher order areas to  
164 modulate the activity of lower level areas (Rockland and Pandya, 1979).

165

### 166 **3. Models of Hierarchy.**

167 The classification of pathways between areas as FF and FB helped motivate the  
168 investigation of the role of the cortical network in terms of FF pathways shaping receptive  
169 fields in their target areas (Hubel, 1995) and FB pathways relaying contextual information  
170 (Gilbert and Li, 2013; Zipser et al., 1996). How the cortical network related to the mosaic of  
171 cortical areas was given substance by Felleman and Van Essen's demonstration that the  
172 layout of cortical areas corresponded to a distributed hierarchy (Felleman and Van Essen,  
173 1991). In their seminal study these authors established a definition of FF and FB connections  
174 largely employing the criteria of Rockland and Pandya (1979), and although principally based  
175 on laminar patterns of anterograde labeling they were able to stipulate criteria so as to include  
176 retrograde labeling therefore enabling them to define pathways with respect to findings  
177 reported in a large number of publications (**Figure 2A**). Pairwise comparisons of the  
178 connections linking areas using these criteria revealed a high regularity; connections that were  
179 classified as FF were largely reciprocated by FB connections, allowing the authors to  
180 establish a distributed hierarchy across multiple streams in the macaque visual cortex shown  
181 in **Figure 2B**. Because of the many parallel pathways and given that hierarchical levels were  
182 defined arbitrarily meant that the precise ordering of cortical areas was ill-defined.  
183 Computational modeling showed that there were over 150,000 equally plausible solutions to  
184 the Felleman and Van Essen Model (**Figure 2C**).

185 A solution to the indeterminacy of the Felleman and Van Essen model could be  
186 overcome by an objective localization of hierarchical level. A suggestion that this might be  
187 the case was the observation that injections of retrograde tracers in early visual areas  
188 generated a progressive decrease in the numbers of labeled FB neurons in supragranular  
189 layers with increasing physical rostral distance (**Figures 3A**) (Kennedy and Bullier, 1985).  
190 Quantitative measures of interareal connectivity showed that patterns of retrograde labeling  
191 were highly consistent across different brains, provided that labeled neurons are summed  
192 across the full extent of a projection zone, defined as the region in a particular source area

193 which contains projections to an injected target area (**Figure 3BC**). Subsequently injections in  
194 cortical areas at higher hierarchical levels generated a progressive increase in the numbers of  
195 labeled FB neurons in supragranular layers with increasing physical caudal distance. In this  
196 manner FF and FB pathways exhibited opposing gradients of projection neurons (Barone et  
197 al., 2000; Kennedy and Bullier, 1985; Markov et al., 2014b). These observations led to the  
198 definition of an index of this gradient based on the proportion of Supragranular Labelled  
199 Neurons or SLN (Barone et al., 2000; Vezoli et al., 2004). Because these changes are highly  
200 consistent across brains, the smooth gradients of inputs from neurons in different layers and  
201 areas to a target area lead to the derivation of a hierarchical distance rule (**Figure 3B**).

202         The transition from a binary model of hierarchy to one based on hierarchical distance  
203 had important consequences. One way of thinking about connectivity gradients (**Figure 3A**)  
204 is that they represent gradual changes in the composition of inputs to the local microcircuit of  
205 a cortical area that is dependent on physical distance. If these changing inputs to the local  
206 microcircuit represent the structural signature of hierarchy it is legitimate to wonder if they  
207 have a functional correlate? If this is the case, then Pascal Fries and his team reasoned that  
208 one can derive a functional hierarchy (Bastos et al., 2015b). The hierarchical distance rule is  
209 based on the fact that supragranular layers primarily send FF projections and infragranular  
210 layers FB projections. In the visual system, superficial and deep layers are characterized by  
211 relatively strong gamma and alpha/beta oscillations, respectively (Buffalo et al., 2011).  
212 Furthermore, whereas in early visual areas, gamma oscillations are relatively strong (Gray et  
213 al., 1989), beta oscillations tend to be strong in higher areas like parietal cortex (Brovelli et  
214 al., 2004; Scherberger et al., 2005). These observations would lead to the prediction that in  
215 the visuo-parietal system interareal synchronization in the gamma frequency band mediates  
216 FF and interareal synchronization in the alpha- and beta-frequency band mediate FB  
217 influences. This turns out to be the case. Frequency-specific directed influences of rhythmic  
218 synchronization are correlated with hierarchical distance, FF pathways are characterized by  
219 synchronization in the theta (4 Hz) and gamma-band (60-80 Hz) and FB in the beta-band (14-  
220 18 Hz) (Bastos et al., 2015b). These observations mean that the structural signatures to the  
221 microcircuit are indeed paralleled by functional signatures (Bastos et al., 2015b). However,  
222 whereas the structural hierarchy is fixed the activity patterns underlying functional hierarchy  
223 exhibit task dependent dynamics.

224         Both structural and functional hierarchies show that the regularities stemming from  
225 laminar distributions of connections and the signals they confer are remarkably consistent. In

226 the following section we address the extent of this consistency in order to formalize how  
227 hierarchy inputs to an area are shaped by distance.

228

#### 229 **4. Hierarchy – Input Consistency.**

230 The notion of hierarchy implies order or rank, so that a prerequisite to determining if  
231 there are hierarchical relations between cortical areas requires determining if order relations  
232 can be defined between them. For example, the Felleman and Van Essen hierarchy was based  
233 on the binary classification of FB/FF relations between areas defined by laminar origin and  
234 termination of projections (Felleman and Van Essen, 1991). A FF projection from area A to B  
235 implied that B was ordered after A. Similarly, a FB projection from B to A would also be  
236 consistent with the above FF relation in assigning B after A. In a hierarchy, we would expect  
237 the two criteria to agree but they need not do so. On a simple level, disagreement could be  
238 taken to define equality of ordinal levels in the sense that equality is defined as those  
239 numbers, A and B, that simultaneously satisfy  $A \geq B$  and  $A \leq B$ . Alternatively, distinct  
240 hierarchical orders might arise: one on the basis of FF laminar projections, the other on the  
241 basis of FB. This could become important when the data supporting multiple laminar FB/FF  
242 pathways are analyzed.

243 The criteria for determining hierarchical rank described above is that they are based on  
244 properties of projections, that define relations between areas. Alternatively, one can consider  
245 properties that are intrinsic to an area, such as cortical thickness, neuron density, soma size,  
246 spine count, spine density and dendritic tree size. These properties have been shown to  
247 display a smooth variation across the cortex that allows ranking of areas in accordance with  
248 the gradation principle of Sanides (Barbas, 2015; Sanides, 1972). Because these properties  
249 vary across the cortex, then a hierarchical ranking can be established trivially by ordering the  
250 areas according to the property. This distinction leads us to consider that criteria for building  
251 cortical hierarchies can be divided into two broad classes that we shall refer to as *node-based*  
252 and *link-based* (**Figure 4A**).

253 Here it is useful to draw an analogy with social networks. A hierarchy in a social  
254 network implies that the actors show specific kinds of interactions with each other (*link-*  
255 *based*). Hierarchy implies that those close to each other in a hierarchy show stronger  
256 interactions with each other than actors that are distant in the hierarchy. More information can  
257 be gauged from the nature of the interactions: We expect that someone high in the hierarchy  
258 (a boss) will show a more directive communication pattern to workers lower in the hierarchy.  
259 The workers, in turn, will show a different ascending communication pattern, e.g. asking



260 more questions. Thus, a hierarchy can be constructed by studying the way in which people  
261 interact with each other, and knowing a hierarchy could in principal allow us to predict these  
262 interactions. By analogy, the SLN can be seen as a measure that directly quantifies the nature  
263 of the interactions between brain areas, based on the laminar projection patterns. Interestingly,  
264 these laminar projection patterns also relate to certain functional interaction patterns (FF  
265 gamma and FB alpha/beta influences). In addition, social hierarchy might also be gauged  
266 from properties of the people in the hierarchy themselves. For instance, one expects the boss  
267 of the company to have the largest office, whereas the workers at the bottom to share an office  
268 and have smaller desks (*node-based*). In some sense, one could argue however, that the *node-*  
269 *based* view is based only on indirect markers and is ultimately grounded in the interaction  
270 *link-based* view.

271 There are critically important differences for constructing hierarchies between node  
272 and link-based information. By definition, node-based relations depend only on a value  
273 intrinsic to the node, not the relations between nodes so they give no information on the  
274 symmetry or otherwise of inter-areal relations. By contrast, ranks based on links are expected  
275 to show reciprocity, so that if there is FF pattern from area A to area B, a FB pattern is  
276 expected from area B to area A. Node based criteria are defined between *any* two areas  
277 independently of whether or not a connection is actually present. Link-based criteria can  
278 provide information on asymmetric relations, provided they are directional and are strictly  
279 defined between areas *only* when there is a direct connection. Nevertheless, hierarchical  
280 ordering between unconnected areas can be achieved through indirect connections.  
281 Generally, links describe the connections that are carrying information between areas and  
282 therefore the manner in which the connections and activity from source areas are integrated  
283 into the local circuit of the target area.

284 In order to define a hierarchical distance scale, i.e., that is not just ordinal, a distance  
285 function,  $d$  has to be defined. This function  $d$  should transform whatever anatomical or  
286 physiological measure one is using into a consistent measure of hierarchical distance across  
287 cortical areas. For example, **Figure 4B** shows a hypothetical distance scale on which 4 areas,  
288 A, B, C, D, are arranged. Suppose that hierarchical distances are estimated based on  
289 measures derived from tracer injections in areas A and B. The injection in area A provides  
290 information about hierarchical distances to areas B, C and D and the injection in B to areas A,  
291 C and D. A consistent measure of hierarchical distance,  $d$ , would generate the same estimate  
292 of distance,  $d_{AB}$ , between areas A and B or, formally, we would expect that  $d_{CA} - d_{CB} = d_{DA} -$   
293  $d_{DB}$ . This is easily derived from the two equations in **Figure 4B** that show for two areas, C

294 and D, the expected relation between the hierarchical distances of a common area to C or D to  
295 two injection sites, A and B. For common projections X, plotting  $d_{XA}$  against  $d_{XB}$  should fall  
296 along a line of unit slope with intercept  $d_{AB}$ . The question is how to define the distance  
297 function  $d$ .

298 In contrast to the binary measure of hierarchy in the Felleman and Van Essen model,  
299 SLN is a continuous measure on the interval (0, 1), thus providing a measure of the degree of  
300 feedforwardness/feedbackness. A binary description treats a projection as FF (FB) if its SLN  
301 is greater (less) than 0.5. Using simply the SLN differences as a hierarchical distance  
302 measure, the Barone et al., 2000 study was able to reproduce nearly all of the features of the  
303 Felleman and Van Essen model based on the SLN values from injections in just two areas, V1  
304 and V4. A notable exception is that the frontal eye field (FEF) that the Barone et al. 2000  
305 study placed *below* the early visual area V4. The SLN value from FEF to V4 was above 0.7  
306 which placed V4 at higher hierarchical levels. Subsequent physiological studies confirmed an  
307 FEF role in early visual processing (Moore and Armstrong, 2003; Schall, 2015), thus  
308 validating its relatively low hierarchical level. The unusual FF pattern for such a caudally  
309 directed projection was further confirmed in other studies (Pouget et al., 2009) and pertains to  
310 a specific link-category on which we expand later.

311 While differences in SLN establish a determinate hierarchical distance measure  
312 between areas, the measure is not necessarily consistent in the manner described in **Figure**  
313 **4B**. As the measure is defined on the interval (0, 1), SLN differences for two areas projecting  
314 to a third area could be quite different from those to another more distant area. An ideal  
315 measure would project the interval (0, 1) to a scale where differences remain linear. This is  
316 commonly accomplished in statistical models, such as generalized linear models (GLM), by  
317 means of a logit or probit transformation (**Figure 4C**) that map the unit interval onto the real  
318 line. As the figure demonstrates, with the proper scaling both of these transformations yield  
319 rather similar mappings.

320 **Figure 5** shows a set of scatter plots for SLN values of common projections for all  
321 area pairs between each of 11 visual areas injected with retrograde tracer (Markov et al.,  
322 2014b). The SLN values are plotted on probit transformed axes. For many of the area pairs,  
323 the point distributions are reasonably well described by a line of unit slope (dashed blue in  
324 each graph), as predicted by a consistent measure of distance, i.e.,  $g(\text{SLN}_j) = g(\text{SLN}_i) + c$ ,  
325 where  $c$  is a constant. Given the similarity of the transforms, it is not surprising that the logit  
326 transformation yields virtually the same linear patterns between area pairs. Thus, this

327 indicates that the ratio of supra- and infra-granular projections follows a gradient across the  
328 cortical areas and constitutes a global signature of hierarchical distance among these areas.

329 Is this laminar pattern of connectivity specific to the visual system or is it a more  
330 general principle of organization of FF and FB pathways in the brain? In support of the latter  
331 hypothesis, **Figure 6** shows paired scatter plots of SLN values for a set of 8 somatosensory  
332 and motor areas in the same format as **Figure 5**. As in the visual system, the transformed  
333 SLN values, here by the similar logit function, provide evidence of a consistent distance  
334 measure in the hierarchical organization among these areas.

335 To quantify the consistency displayed in these pairs plots, we proposed a model to  
336 estimate hierarchical distances based on SLN values, but as we argue below, the model is  
337 quite general in its application. In short, we suppose that we can assign hierarchical levels,  $h_i$   
338 and  $h_j$ , to all area pairs  $i$  and  $j$ , based on a measure of differences between properties linking  
339 the areas. For example, in the case of SLN, we suppose

$$340 \quad g(\text{SLN}_i^p) - g(\text{SLN}_j^p) = h_i - h_j,$$

341 where  $g$  applies a logit or probit transformation to SLN values, from an injection into area  $p$   
342 that receives projections from areas  $i$  and  $j$ . This suggests a formalism similar to a GLM with  
343 a binomial family. The SLN is taken as a binomial variable (neurons are found in the upper  
344 or lower cortical layers) and the sum of neurons in both compartments is used as a weight.

345 The key feature of the model that relates the estimates of hierarchy to the biological  
346 measure (i.e. the transformed SLN values) is the incidence matrix,  $\mathbf{X}$ , of the cortical graph.  
347 The incidence matrix of the graph is defined to have a column for each node and a row for  
348 each link. In each row, all values are 0 except for the two nodes of the link, taking on values  
349 of -1 and 1, respectively for source and target, if the link is directed. The product of the  
350 incidence matrix and the vector of hierarchical values,  $h$ , maps the differences in hierarchical  
351 value between two areas with the differences between the transformed SLN.

$$352 \quad g(\text{SLN}_i^p) = \mathbf{X}h$$

353 where the left side of the equation is the difference between transformed SLN values of the  
354 source area  $i$  and the injection site  $p$ . The vector  $h$  contains the hierarchical coefficients to  
355 estimate and its length is equal to the number of columns of the model matrix. The model as  
356 defined is not identifiable because the sum of every row equals 0, but by dropping one  
357 column, for example, area V1 in the visual hierarchy, the hierarchical coefficients can be  
358 estimated with the area corresponding to the dropped row fixed at a hierarchical level of 0.

359           This resembles a logistic or probit regression problem. However, these models yield  
360 standard errors for the estimated coefficients that are unrealistically small. Alternatively, we  
361 have used a beta-binomial model; this arises naturally as a binomial model in which the  
362 response, which in the current context is the expected SLN value, has variability greater than  
363 that specified by the binomial distribution and its distribution is described by a beta  
364 distribution (Lesnoff and Lancelot, 2012). For present purposes, the model can be  
365 reparameterized to include a dispersion parameter that better models the overdispersion  
366 typically observed in neural counts (see ((Markov et al., 2014a) for further details). Once the  
367 statistical model is specified, the coefficients are estimated by maximum likelihood. Note  
368 that because numbers of neurons are used in the model and not just the SLN proportions, this  
369 method generates a weighted hierarchy.

370           The formalization is quite general. For example, if instead of SLN, a binary variable  
371 is used simply specifying whether a connection is of a FF or FB type, then the model  
372 corresponds to the original problem that Felleman and Van Essen solved. We have found that  
373 fitting the model in this fashion leads to coefficients with much larger standard errors (**Figure**  
374 **7A**), thus, providing an alternate demonstration of the indeterminacy or limited information  
375 on hierarchy contained in purely binary relations. Thus, the use of a quantitative measure of  
376 hierarchy leads to a more exact solution (**Figure 7B**).

377           To summarize our approach, a qualitative assessment of a hierarchical gradient is  
378 initially evaluated visually by choosing a (possibly transformed) measure of the hierarchical  
379 difference between area pairs and using pairs plots to assess the pairwise consistency of the  
380 distance measure. If the evidence looks promising, the hierarchical values are obtained by  
381 fitting a model that maps the hierarchical estimates to the biological measure of the gradient  
382 via the network incidence matrix. If a suitable probability distribution can be assigned to the  
383 biological measure, the solution can be obtained by maximum likelihood, but other methods,  
384 for example introducing Bayesian priors, might be applied in appropriate circumstances.

385           The visual hierarchy estimated from our model is shown in **Figure 8A** and resembles  
386 qualitatively the FVH. In contrast, the levels are continuously distributed. Here we have split  
387 FEF into area 8L and 8M corresponding to regions involved in small and large saccades,  
388 respectively. Area 8L occupies a low position in the hierarchy while 8M is several levels  
389 higher. The goodness of fit of the model is indicated by plotting the empirical SLN values  
390 against those predicted by the model (**Figure 8B**) and shows that the model accounts for a  
391 high proportion of the variance in the data. The functional implications of this model have  
392 been explored in several contexts (Bastos et al., 2015b; Chaudhuri et al., 2015; Magrou et al.,

393 2018) and preliminary observations indicate that it is applicable to data from the mouse  
394 (D'Souza et al., 2020).

395 The use of a transformation of SLN to estimate hierarchical distance imposes strong  
396 constraints on inter-areal SLN relations. We demonstrate this in **Figure 8C** by using the logit  
397 transform, which performs quantitatively nearly identically to the probit transform (**Figure**  
398 **4C**), but allows expression of the hierarchical relations in terms of ratios of projection  
399 strengths. The model defines hierarchical distance,  $h_{ij}$ , between two areas,  $i$  and  $j$ , as the  
400 difference between the logit of SLN values for their projections to a target area,  $p$ , shown in  
401 the top equation. For the logit, this distance is just the natural log of the ratio of ratios of  
402 supra- to infragranular projection strengths from areas  $i$  and  $j$  to  $p$  (orange arrows in **Figure**  
403 **8C**, left). If the hierarchical distance measure is consistent, we expect that ratio to be the  
404 same for projections to any other area,  $q$ , (blue arrows in **Figure 8C**, left) as shown by the  
405 equation below the diagram. A simple rearrangement of this identity demonstrates that the  
406 ratio of projections from area  $i$  to areas  $p$  and  $q$  (orange arrows in **Figure 8C**, right) should be  
407 the same for any other area  $j$ , projecting to areas  $p$  and  $q$ . Thus, the hierarchical model we  
408 propose implies strong invariances in the ratio of FF to FB projection strengths from common  
409 inputs and outputs across areas. We further hypothesize that these invariances impose  
410 constraints on the exchange and stability of information flow across the cortical hierarchy.

411 One might suppose that when simultaneous retrograde tracer injections are made in  
412 reciprocally connected areas that the pair of areas would display a reciprocal FF-FB relation.  
413 That is to say, the origin of the majority of projections from one area would arise from upper  
414 layers and the principal origin of the reciprocating projections from lower layers. This  
415 arrangement would naturally lead to the hierarchical regularities that we observe. However,  
416 this regularity is not imposed by our model, nor is it always found to occur. In effect, this is  
417 what explains the surprising observation (noted above in the hierarchy derived in **Figure 8A**)  
418 of a prefrontal area like 8L at the same hierarchical level as early visual areas V3 and V4. As  
419 expected, the projections from several lower order visual areas, e.g., V4 and TEO, to area 8L  
420 originate in upper layers signifying FF, projections. However, 8L projects back to these areas  
421 through FF projections also originating in upper layers (Barone et al., 2000; Markov et al.,  
422 2014b). We designate such FF-FF connections as strong loops (Crick and Koch, 1998). They  
423 correspond to the situation described earlier in an order relation that when  $A \geq B$  and  $B \geq A$ ,  
424 then  $A = B$ .

425 In the Felleman and Van Essen model, FF (FB) projections connect upstream  
426 (downstream) areas in a bottom-up (top-down) fashion placing hippocampus, anterior

427 temporal and prefrontal areas at the top and occipital areas at the bottom of the visual  
428 hierarchy. As such, this model described two main counterstreams involved in hierarchical  
429 processing within the visual system: a rostro-caudal gradient of FB projections reciprocated  
430 by a caudo-rostral gradient of FF projections. Interestingly, in the data base of visual areas on  
431 which the Felleman and Van Essen model was based, only one pathway have been reported –  
432 between FEF and CITd (dorsal part of inferior temporal cortex) that corresponds to a strong  
433 loops. This led Crick and Koch (Crick and Koch, 1998) to speculate that such configurations  
434 were forbidden in cortical organization. However, we have identified a significant number of  
435 strong loops in our data base. **Figure 8D** shows how the  $\log_{10}$  FLN varies as a function of  
436 distance estimated through the white matter from the source area to the target injection site,  
437 referred to as white matter (WM) distance), replotted from Ercsey-Ravasz et al. (Ercsey-  
438 Ravasz et al., 2013). The beige points correspond to those connections that participate in  
439 strong-loops i.e. area pairs for which SLN is greater than 0.5 in both directions. For reference,  
440 the saturation of these points indicates their SLN values with less saturated points indicating a  
441 higher SLN, as shown by the inset color bar. As expected, most of the SLN values near 1  
442 cluster to the right as more long distance connections. There is a fair amount of scatter among  
443 the points but they do display a distance rule (blue regression line) just as the rest of the  
444 connections do (black regression line). Interestingly, the strength of the strong loop  
445 projections is on average greater than the rest of the projections. This suggests that they are  
446 likely to play a unique role in cortical computation. What that role is currently remains a  
447 mystery. However, some experimental evidence are in favor of an attentional role concerning  
448 the strong-loop between FEF and V4. FEF projections can drive attentional response in V4  
449 (Moore and Armstrong, 2003), through selective gating of V4 receptive-fields (Armstrong et  
450 al., 2006). Further evidence points to the involvement of fast rhythmic synchronization during  
451 FEF attentional modulation of V4 visual responses (Gregoriou et al., 2012; Gregoriou et al.,  
452 2009), strongly suggesting a supragranular origin (Bastos et al., 2015a; Markov et al., 2014b).

453 The results reveal a high-degree of consistency of the structural regularities underlying  
454 cortical hierarchy in the sensory cortex. But how generalizable are these findings across the  
455 more anterior regions, particularly in frontal and prefrontal cortex (Badre and D'Esposito,  
456 2009; Choi et al., 2018)? One of the few studies that has addressed the structural hierarchy  
457 with tract tracing of the prefrontal cortex (Goulas et al., 2014) found little evidence of the rich  
458 rostral to caudal hierarchical organization that has been reported in human imaging studies  
459 (Badre and D'Esposito, 2007; Koechlin et al., 2003). The controversial issue of frontal cortex  
460 and hierarchical control shows promise of resolution via a revision of the concept of a unitary

461 model ensuring a unidimensional gradient. Recent reports favor distinct networks that are  
462 proposed to interact thereby ensuring a global hierarchical structure (Schumacher et al.,  
463 2019). Nevertheless, the mismatch between the multistage cascade architecture mediating a  
464 temporal organization of cognitive control and inter-areal connectivity contrasts with the  
465 situation in the visual cortex where there is a smooth increase in receptive field size ascending  
466 the Felleman and Van Essen cortical hierarchy (Roelfsema and de Lange, 2016). The  
467 mismatch reported in the prefrontal cortex is between the concept of a smooth and gradual  
468 rostral-caudal organization found in the imaging studies and the connectivity as found in the  
469 collated and binary data base. What about the relation of SLN across prefrontal areas? In  
470 **Figure 9A**, the SLN pairs plots for the prefrontal cortex show an encouraging agreement with  
471 that described in visual cortex. The hierarchical scale values estimated from the statistical  
472 model described above (**Figure 9B**) seem to support a rostral-caudal organization with F1 at  
473 the bottom and areas 10 and 24c (the most anterior limbic region) at the top. Note, analysis  
474 based on more complete coverage of the frontal cortex might give significantly improved  
475 results.

476

## 477 **5. Dual stream Architecture.**

478 In the preceding section we showed that the contributions of supra- and infragranular  
479 layers in the projections across hierarchical levels were highly consistent. Here we explore  
480 recent findings showing that there are distinct and separate FF and FB pathways in both the  
481 upper and lower layers constituting a Dual Stream Architecture (Markov JCN 2013), which  
482 leads to the hypothesis that FB signals in upper and lower layers have distinct roles in  
483 information processing.

484 There are a number of reasons for expecting that supra- and infragranular layers might  
485 house different FF and FB pathways. During corticogenesis the supragranular compartment is  
486 generated by a primate-specific germinal zone (Smart et al., 2002), exhibiting uniquely  
487 complex lineages (Betizeau et al., 2013; Dehay et al., 2015; Lukaszewicz et al., 2005),  
488 findings that have consequently been amply confirmed in human corticogenesis (Geschwind  
489 and Rakic, 2013). These specialized developmental origins of the supragranular layers are  
490 linked to the observed expansion of these layers in primates culminating in human (Cahalane  
491 et al., 2014; Sousa et al., 2017), and a diversification of cell-types, which we speculate  
492 underlies the observed coding properties of these layers in the adult primate cortex (Tang et  
493 al., 2018; Vinje and Gallant, 2000; Wang and Kennedy, 2016; Willmore et al., 2011). A

494 number of studies have shown that supragranular layers exhibit sparse coding in which large  
495 numbers of cells are characterized by low levels of activity and a sensory stimulus activates  
496 only few neurons (Barth and Poulet, 2012; Crochet et al., 2011; Haider et al., 2013; Harris  
497 and Mrsic-Flogel, 2013; Petersen and Crochet, 2013; Tang et al., 2018). In a sparse code  
498 information is encoded at any instant by the spiking of a small number of neurons, as opposed  
499 to a dense code where overall activity is high and information is encoded by variation in firing  
500 rate as observed in the infragranular layers (Sakata and Harris, 2009). A sparse code reduces  
501 redundancy and is arguably more efficient. Studies indicating sparse coding in supragranular  
502 layers find evidence of higher levels of recruitment of inhibitory drive in these layers via fast  
503 spiking PV+ neurons (Hu et al., 2014), which supports the presence of distinct frequency  
504 channels for FB and FF communication (Bastos et al., 2018; Bastos et al., 2015b; Michalareas  
505 et al., 2016). In addition, sparse coding, supragranular neurons in V1 showed more complex  
506 and specific selectivity than expected for primary visual cortex (Bonfond et al., 2017).

507         A more detailed description of the laminar organization of inter-areal connectivity  
508 suggests that variation of SLN with distance has complex origins concerning inter-areal  
509 connectivity in sublayers of the cortex. Exhaustive examination of inter-areal connectivity  
510 shows, that whereas canonical FB streams have been traditionally allocated to infragranular  
511 layers, a robust supragranular FB stream is in addition found in layer 2 (L2) in all areas  
512 examined in the extrastriate visual cortex of the macaque (**Figure 10A**) (Markov et al.,  
513 2014b). In addition to the L2 FB, we found some evidence of a L5 FF stream. Hence, in both  
514 upper *and* lower compartments there is a counter stream leading to the term dual  
515 counterstream architecture. Interestingly, the two FB streams in the supra and infragranular  
516 layers will impact differently the canonical microcircuit (**Figure 10B**) (Douglas et al., 1989).  
517 The strict segregation of FF and FB streams was hypothesized by Ullman in his  
518 counterstream model, which he proposed allows a bi-directional search for optimal matches  
519 between descending and ascending pathways (Ullman, 1995, 2000).

520         Closer examination of the individual streams showed that each obeys a unique  
521 distance rules. In all streams labeled cell counts decline with WM distance, however the rate  
522 of decline is characteristic for a given stream. In this way, the classical FB stream in L6 of the  
523 infragranular layers has the most gradual decline so that these FB connections span the  
524 biggest distance in the cortex. This contrasts with the L2 FB, which shows a much shorter  
525 space constant. Hence it is the combination of the space constants of the L2 and L6 FB  
526 streams that leads to the observed SLN values going up stream from near to far-distant areas



527 (See **Figure 11**). The classical FF stream in L3 is also long-distance stream, but significantly  
528 less than the FB L6 stream, thus leading to the observation of the greater reach of FB  
529 pathways compared to FF pathways (Markov et al., 2014b).

530 Hence, the dual counterstream architecture shows that the relative rate of decline in  
531 individual streams determines the way that SLN is modulated by WM distance. In section 3  
532 (Hierarchy –input consistency) we showed that the agreement between SLN values across  
533 hierarchical levels is relatively constant across the extrastriate macaque cortex, but less so for  
534 the prefrontal cortex. These differences between frontal and posterior regions could be driven  
535 by two sets of factors. Firstly, quite simply the space constant can change in individual layers  
536 so that the two regions sample supra- and infragranular layers over different WM distances.  
537 For example, if the difference in space constants of L2 and L6 FB streams are reduced then so  
538 are the SLN differences and there will be a reduction of the hierarchical distance as such  
539 between a group of areas with a common target. A second factor could be the identity of cells  
540 in the two streams. Comparison of the gene expression across species has revealed that some  
541 genes in rodents that are exclusively expressed in deep layers are expressed in the  
542 supragranular layers of primates (Zeng et al., 2012). Such changes in the laminar phenotype  
543 could perhaps occur across regions meaning that the L2 FB pathway in the prefrontal cortex  
544 may not correspond to the same identities as the FB pathway in extrastriate cortex.

545

## 546 **6. Functional characteristics of FF and FB pathways.**

547 In the present review we propose that cortical hierarchy can be gauged from the *nature*  
548 of the interactions between different brain areas, in the same manner that hierarchies in social  
549 networks reflect the nature of interactions between people. Crucially, our measure of  
550 hierarchical distance shows that SLN values of area pairs are highly consistent across multiple  
551 hierarchical levels. This consistency in conjunction with the known differences in oscillatory  
552 properties of laminar compartments of the cortex suggests that FF and FB interactions are not  
553 only anatomically distinct, but (i) use specific frequencies for communication and (ii) play  
554 specialized roles in cortical computation. Here we address how these functional properties  
555 relate to the detailed anatomical properties of FF and FB pathways.

556 As described above functional interactions between brain areas are distance dependent  
557 (Bastos et al., 2015b; Michalareas et al., 2016; Richter et al., 2018; van Kerkoerle et al.,  
558 2014). Granger-causality was used to quantify functional FF and FB interactions, thereby  
559 allowing the strength of these interactions to be quantified for individual frequency bands.

560 Neuronal populations show spontaneous fluctuations over time that are driven by brain  
561 rhythms in different frequency bands, such as theta (3-8Hz), alpha (8-12Hz), beta (12-30Hz)  
562 and gamma (30-80Hz). Note, neocortical rhythms do not comprise band-limited sinusoidal  
563 oscillation but typically describes noisy oscillations with energy in a wide frequency range  
564 (Burns et al., 2011; Spyropoulos et al., 2019). FF Granger-causality is particularly strong in  
565 the gamma-frequency band, while FB Granger is strong in the alpha and beta-frequency band  
566 (Bastos et al., 2015b; Michalareas et al., 2016; Richter et al., 2018; van Kerkoerle et al.,  
567 2014).

568       Exploiting empirical connectivity data Mejias et al. (Mejias et al., 2016) built a  
569 dynamical model of multi-regional macaque monkey cortex endowed with a laminar  
570 structure. The model captures stochastic fast oscillations in the gamma frequency range in the  
571 superficial layers, and lower-frequency (alpha) oscillations in the deep layers. Importantly, in  
572 contrast to regular oscillators, such network rhythms are quite irregular and noisy, compatible  
573 with the notion of sparsely synchronous brain rhythms (Wang 2010), which provides a  
574 unifying framework for accounting both population oscillations and Poisson-like highly  
575 variable spike trains of single neurons. The model accounts for the distinct signatures of  
576 frequency-dependent Granger causality that reflect FF versus FB signaling, and reproduces  
577 the experimentally deduced neural population dynamics that are consistent with the  
578 anatomically defined hierarchy. Therefore, this model offers a computational platform for  
579 investigating interactions between bottom-up and top-down processes including predictive  
580 coding.

581       The finding that Granger-causality in the FF (FB) direction is strong in gamma  
582 (alpha/beta) frequencies is partially dictated by the cellular targets of inter-areal pathways. FF  
583 inputs target both excitatory and GABAergic interneurons (**Figure 12**). Importantly, the FF  
584 projections to GABAergic interneurons target almost uniquely parvalbumin – PV  
585 interneurons, which are associated with gamma-frequency rhythms and respond to excitatory  
586 inputs with high temporal fidelity (Buzsaki and Wang, 2012; Cardin et al., 2009; Jouhanneau  
587 et al., 2018; Wang, 2010), and exhibit supra-threshold resonance at gamma-frequencies  
588 (Hasenstaub et al., 2005; Pike et al., 2000). Moreover FF projections skip the infragranular  
589 layers that are canonically associated with alpha and beta rhythms (Bollimunta et al., 2008;  
590 Buffalo et al., 2011; van Kerkoerle et al., 2014). By contrast, FB projections target multiple  
591 classes of GABAergic interneurons. Of these, somatostatin – SSt interneurons are associated  
592 with the generation of slower brain rhythms (Moore et al., 2010), and can directly influence

593 activity of neurons in infragranular compartments, which are associated with alpha/beta  
594 rhythms.

595 Frequency-specific information transmission can also be predicted by the properties of  
596 the *sending* and *receiving* areas, so that the global distribution of brain rhythms across areas  
597 and layers contribute to the nature of functional interactions in the FF and FB directions.  
598 Gamma-rhythms are particularly strong in early visual areas *and* superficial layers (Bastos et  
599 al., 2015a; Buffalo et al., 2011; van Kerkoerle et al., 2014; Vinck and Bosman, 2016),  
600 whereas beta rhythms are most prominent in fronto-parietal areas *and* infragranular  
601 compartments (Bastos et al., 2015a; Buffalo et al., 2011). Consequently, one expects Granger-  
602 causal FF influences from early visual areas to parietal areas to be dominated by gamma  
603 frequencies, whereas FB influences to visual areas to be dominated by beta frequencies, in  
604 agreement with the fact that major long-range FF projections originate nearly exclusively  
605 from superficial layers, and FB from infragranular layers. Further, we note that gamma  
606 frequencies are generally associated with cortical activation, e.g. a visual stimulus or  
607 optogenetic activation, whereas alpha and beta frequencies are not clearly associated with a  
608 FF stimulus drive, consistent with the suggestion that FF provide the major driving influence  
609 (Covic and Sherman, 2011; De Pasquale and Sherman, 2011).

610 Above we hypothesized that these frequency specific channels constitute functional  
611 analogues of the SLN projections that we have quantified, leading to the expectation that they  
612 exhibit similar hierarchical properties. Bastos et al. (2015) defined the multiple Directed-  
613 influence Asymmetry Index (mDAI) based on the difference of gamma and theta vs beta  
614 frequency Granger-causality, obtained from ECoG recordings in macaque. mDAI enabled  
615 these authors to reconstruct hierarchies that closely resembled the structural hierarchy derived  
616 from SLN values. The feasibility of accounting for their data with the model that we  
617 presented above is demonstrated by the strong tendency of mDAI values corresponding to  
618 common projections to lie along lines of unit slope (**Figure 13**). The mDAI index is already  
619 on a scale that appears to show the consistency necessary to apply the model, so the  
620 hierarchical values could be estimated from the incidence matrix in a global fashion rather  
621 than by the averaging method used by Bastos et al. (2015).

622 Future work will need to specifically address the nature of layer-specific functional  
623 interactions for individual FF and FB projections. The dual counterstream architecture  
624 postulates that a prominent short-range FB projection originates from L2 in the higher area.  
625 Consequently, we predict that FB from L2 is particularly strong at gamma-frequencies.  
626 Likewise, L5 is postulated to have a short-range FF projection, and to exhibit strong

627 oscillations at alpha/beta frequencies. Hence, based on the dual counterstream architecture we  
628 predict a greater diversity of functional interactions than suggested by previous work, the  
629 elucidation of which will require multi-layer high-density recording across multiple cortical  
630 areas.

631

## 632 **7. Diversity of FB pathways and their function in neural computation**

633 In this section, we consider the possible functions of cortical FB and hierarchical  
634 organization in information processing. A large body of physiological studies has shown that  
635 FF pathways ascending the hierarchy generate increasingly complex representations of the  
636 world in higher areas, leading to the large range of receptive field properties observed at  
637 different levels of the hierarchy. Thus, at its core, convergent FF projections carry information  
638 from the outside world, and allow this information to be gradually transformed to low-  
639 dimensional representations that can be exploited for behavior. In this respect, it is  
640 worthwhile noting that the recent success of deep neural network architectures in solving  
641 complex tasks similarly demonstrates the power of FF transformations in computation  
642 (LeCun et al., 2015; Richards et al., 2019).

643 In contrast to FF-pathways, the neurobiology of the significantly *more* numerous FB  
644 pathways (Markov et al., 2014a) remains elusive, forming a major impediment to  
645 understanding the brain. A clearly defined role of FB connections is in attention, but FB  
646 pathways are likely critical in a host of complex operations including: the comparison of  
647 internally generated predictions of sensory input with actual inputs; imagining sensory inputs  
648 associated with a concept; carrying out mental simulations and finally gating synaptic  
649 plasticity.

650 An early conceptualization of hierarchical processing in the cortex conceived of FF  
651 pathways driving target areas, and in contrast FB pathways merely exerting a modulatory  
652 influence (Klink et al., 2017), however, some researchers hold a more nuanced view (Bastos  
653 et al., 2012). Indeed, the simple dichotomy of the roles of FF and FB pathways is difficult to  
654 reconcile with the multiple physiological effects that are imputed to FB control. For example,  
655 in the case of imagination, FB is conceived to *enhance* neural activity; by contrast in the case  
656 of filtering out self-generated sensory inputs, FB activity is expected to *suppress* neural  
657 activity. These forms of enhancement and suppression represent essentially distinct  
658 computational operations: a central concept is that of *gain modulation*, where an existing  
659 sensory representation is preserved, but in essence multiplied or divided, as in attentional  
660 mechanisms (McAdams and Maunsell, 1999). However, in the case of imagery, one expects

661 FB to “*write-in*” a pattern of neural activity, i.e. operate a *driving* process, or alternatively  
662 selectively modulate the activity of specific spontaneously active cell assemblies. In the case  
663 of *cancelling out* self-generated sensory inputs through FB (as in self-tickling), FB activity is  
664 thought to be *subtractive* (Bastos et al., 2012). Finally, FB activity has been conceived to  
665 mediate *error* signals, playing a key role in shaping perceptual learning and synaptic  
666 plasticity. The notion of FB as a “swiss-army-knife” contrasts with FF processing which is  
667 essentially homogeneous and driving, as captured by the architecture of deep neural networks.  
668 These considerations underline the diversity of FB processes, which could be mediated by  
669 distinct neural circuits. In particular, we hypothesize that laminar and distance-determined  
670 diversity of FB pathways will exhibit anatomo-functional properties that characterize the  
671 cortical circuits underlying the diverse global influences engaged in different cognitive  
672 functions. Given the diversity of FB pathways, and the many functions in which FB is  
673 implicated, it is a daunting task to develop a unified theory of the function of cortical FB. Yet,  
674 our understanding of the brain depends crucially on the development of precise theories of  
675 cortical FB.

676 The core feature of FB that distinguishes it from FF is that its projections are  
677 divergent; i.e. they project from few to many neurons. Interestingly, divergent projections are  
678 a core feature of the most popular kind of artificial neural network architectures, which are  
679 also rapidly becoming a mainstream model of sensory processing in the brain (LeCun et al.,  
680 2015; Richards et al., 2019). In FF (deep) neural networks, divergent error signals lead to an  
681 adjustment of synaptic weights of FF projections (“backprop”). In other words, in FF (deep)  
682 neural networks, the exclusive role of FB is to improve the data transformations implemented  
683 by the FF projections. For biological organism, error signals could be provided for instance  
684 by multi-sensory signals or reward signals. However, it is an open question how FB would be  
685 able to adjust synaptic weights of FF projections (Whittington and Bogacz, 2019). A  
686 candidate pathway is the multiple FB projections converging onto L1 where they impact the  
687 distal dendrites of pyramidal neurons, activating non-linear NMDA-R-dependent dendritic  
688 integration mechanisms and voltage-gated calcium channels. Indeed, a recent study provides  
689 evidence that top-down FB to L1 might indeed be involved in perceptual learning in a  
690 primary sensory area: With reward reinforcement, mice rapidly learn a behavioral task in  
691 which their response is contingent on electric-current stimulation of S1. However, when L1  
692 projections from perirhinal cortex to S1 are inhibited, mice fail to learn the same task,  
693 suggesting that top-down FB is instructive for learning (Doron et al., 2019). Another  
694 candidate pathway to modulate plasticity is the FB projection to VIP+ and SOM+

695 interneurons, given that SOM+ neurons can gate plasticity on the dendrites of pyramidal  
696 neurons (Batista-Brito et al., 2018).

697         There are major challenges at a conceptual level with the notion that FB signals  
698 transmit errors. In particular, the above mentioned learning experiment is in essence a  
699 supervised learning model, in the sense that FF networks are trained to make specific sensory  
700 decisions (e.g. recognizing a red apple as a red apple) based on some supervised FB (e.g.  
701 multisensory: someone telling you it is a red apple; or reward: learning that red apples are  
702 delicious). However, it is not clear whether this kind of FB would be sufficient for sensory  
703 learning. In the next section, we consider an alternative view on FB connections, namely that  
704 of a top-down generative network, in which divergent FB connections generate high-  
705 dimensional sensory representations starting from low-dimensional representations in higher  
706 brain areas.

707

## 708 **8. Top down pathways constitute multiple generative networks?**

709         In recent years the idea has emerged that top-down connections may have a generative  
710 function that can play an important role in generating sensory representations (Bastos et al.,  
711 2012; Hinton, 2007; Kosslyn, 1994; Mumford, 1992; Senden et al., 2019). In FF visual  
712 processing, high-dimensional sensory representations such as an image are sequentially  
713 transformed into low-dimensional representations such as object categories, represented at  
714 higher hierarchical levels. Conceivably FB pathways *invert* this process by generating high-  
715 dimensional representations starting from low-dimensional variables (Hinton, 2007). We refer  
716 to such pathways as top-down generative networks. Whereas the FF projections in  
717 convolutional networks create a convergence of information from many to few, in generative  
718 networks information is relayed by divergent projections from few to many. For instance, the  
719 perception of a red apple depends on a transformation of the image of a red apple (represented  
720 by many neurons) into high-level representations in the temporal lobe (represented by few  
721 neurons). However, if we imagine a red apple, processing should start from high-level  
722 representations (few neurons) and generate a low level neural representation of the image of a  
723 red apple (represented by many neurons).

724         Links between visual processing in deep artificial neural networks and the brain have  
725 been extended in recent years to cover putative roles of FB connections, and have started to  
726 involve generative neural network models (Bashivan et al., 2019; Hahn et al., 2019;  
727 Kietzmann et al., 2019; Nayebi et al., 2018). FB may enable approximate, probabilistic  
728 simulations to make robust and fast inferences in complex natural scenes where crucial

729 information is unobserved (Battaglia et al., 2013). Analogues of mental simulation and  
730 imagery play an important role in model-based reinforcement learning (Hamrick, 2019).  
731 Moreover, the most powerful generative neural networks in machine learning such as GANs  
732 (generative adversarial network) and VAEs (variational autoencoder) have evolved  
733 substantially away from older and less efficient models for generative neural networks,  
734 raising the question as to what generative networks the brain uses.

735 An influential model of brain function that incorporates the notion of generative  
736 networks is the predictive coding framework. Predictive coding proposes that FB pathways  
737 transmit precise top-down reconstructions of sensory inputs and FF pathways signal  
738 reconstruction errors (Bastos et al., 2012; Mumford, 1992; Rao and Ballard, 1999). As  
739 discussed above in Section 5, in FF neural networks, error signals are thought to flow along  
740 FB pathways from high to low hierarchical levels. By contrast, predictive coding postulates  
741 that error signals do not flow down, but instead *up* the hierarchy. Error signals are postulated  
742 to be generated by the comparison (e.g. through subtraction) of FF inputs and FB predictions.  
743 The function of these error signals is to update information stored at high levels in the  
744 hierarchy, leading to the formation of improved latent, generative models of the world,  
745 embedding a self-supervised learning scheme that minimizes surprise. Many studies have  
746 shown that cortical activity is indeed modulated by sensory predictions or expectation, with  
747 enhanced activity for surprising stimuli (Bastos et al., 2012; de Lange et al., 2018), although  
748 factors such as adaptation and bottom-up attention or salience (Li, 2002) could provide  
749 alternative interpretations for experimental findings. Hence, it remains unknown whether FF  
750 projections do in fact carry *error signals* resulting from a comparison between FF and FB  
751 predictions (from the previous upper area) that can be understood as a precise mathematical  
752 operation (e.g. subtraction).

753 Most of the research in the framework of predictive coding has focused on the  
754 modulation of activity in lower areas by expectations or predictions induced by some  
755 behavioral task or stimulus repetition (Bastos et al., 2012; de Lange et al., 2018), however,  
756 little research has focused on testing whether FB connections in the brain are the substrate of  
757 a top-down generative network. The dual stream counterstream architecture suggests several  
758 features that are congruent with the hypothesis of top-down generative networks: (1) the  
759 convergence of cortical FF connections in the sensory stream is mirrored by the divergence of  
760 FB connections; (2) source populations of FF and FB pathways are completely separate,  
761 which has been recognized as a key requirement enabling distinct functionalities of generative  
762 top-down networks (Friston, 2018; Markov and Kennedy, 2013; Markov et al., 2014b; Shipp,

763 2016) (3) on average throughout the cortex there are twice as many FB pathways than FF  
764 projections to a given area. Studies in which human subjects are cued to generate a sensory  
765 percept also provide evidence for top-down generative networks in the cortex (Emmerling et  
766 al., 2016; Naselaris et al., 2015; Senden et al., 2019; Slotnick et al., 2005; Thirion et al.,  
767 2006).

768 While predictive coding assigns a relatively restricted role to top-down generative  
769 networks in terms of transmitting sensory predictions, they may play distinct functional roles  
770 in specific cognitive tasks such as mental simulation, imagery or feature attention. An  
771 attractive idea of the generative top-down network hypothesis is that all of these functions are  
772 subserved by a relatively small number of anatomical FB pathways implementing a function-  
773 specific generative network. This network would then interact with distinct cellular  
774 components in individual target areas in order to interact in different ways with ongoing  
775 ascending FF activity. As an example, we can take the processes of *imagination, predictive*  
776 *processing and attention*. In the case of *imagination* (e.g. thinking of a red apple), generative  
777 networks are expected to drive activity in lower areas based on the activation of neurons in  
778 higher areas; this effect can occur in the absence of any sensory stimulation. In the case of  
779 *predictive processing* (e.g. walking to the kitchen and expecting to see a red apple in the fruit  
780 basket, but not in the sink), generative networks may cause a reduction of neural activity in  
781 case a predicted stimulus occurs, whereas non-predicted stimuli would not be suppressed by  
782 top-down predictions. Finally, in the case of attention (e.g. searching for a red apple in the  
783 kitchen), generative networks may lead to an amplification of sensory activity when we find  
784 the stimulus that we were seeking.

785 Examining the dual counterstream suggests a possible division of labor between L2  
786 and L6 FB projections: L2 FB and L3 FF projections exhibit common features that  
787 distinguish them from L6 FB. L2 FB and L3 FF are short distance, topographically organized  
788 and exhibit low rates of bifurcation; contrasting with L6 FB which are long-distance, diffuse  
789 and have high rates of bifurcation. Thus, the L2 FB system may mirror the L3 FF system and  
790 implement a generative top-down network in which high-dimensional sensory representations  
791 can be generated through sequential stages, starting from higher brain areas. The L6 FB  
792 pathway, on the other hand, may determine the way in which the L2 generative network  
793 interacts with the local microcircuit, sending contextual signals that reflect behavioral goals  
794 and reward signals. Based on this hypothesis, we predict that L6 FB has more modulatory  
795 effects that it exerts, for example, via targeting the apical L1 dendrites as well as GABAergic  
796 interneurons such as SOM+ and VIP+ interneurons that modulate the activity of local



797 pyramidal neurons (Batista-Brito et al., 2018). Testing this hypothesis will require parallel  
798 anatomical and physiological investigations. Optogenetic techniques in non-human primates  
799 could allow the injection of precise spatiotemporal activation patterns into specific laminar  
800 compartments of higher brain areas, combined with physiological measurements of activity in  
801 lower brain areas.

802

### 803 **Box 1**

#### 804 **Experimental Exploration of the Dual Counterstream Architecture.**

805 **Dual counterstream features** **Functional and structural correlates**

|                                                                                                                                                                                                                                                                                                                                                                                                                                                                                                                                                                                                                                                                                                                                                                                                                                                                                                                                                           |                                                                                                                                                                                                                                                                                                                                                                                                                                                                                                                                                                                                                                                                                                                                                                                                                                                                                                                                                 |
|-----------------------------------------------------------------------------------------------------------------------------------------------------------------------------------------------------------------------------------------------------------------------------------------------------------------------------------------------------------------------------------------------------------------------------------------------------------------------------------------------------------------------------------------------------------------------------------------------------------------------------------------------------------------------------------------------------------------------------------------------------------------------------------------------------------------------------------------------------------------------------------------------------------------------------------------------------------|-------------------------------------------------------------------------------------------------------------------------------------------------------------------------------------------------------------------------------------------------------------------------------------------------------------------------------------------------------------------------------------------------------------------------------------------------------------------------------------------------------------------------------------------------------------------------------------------------------------------------------------------------------------------------------------------------------------------------------------------------------------------------------------------------------------------------------------------------------------------------------------------------------------------------------------------------|
| <p>(1) <i>Source populations of FF and FB pathways are completely separate</i>, which has been recognized as a key requirement enabling distinct functionalities of generative top-down networks (Friston, 2018). A core feature of the dual counterstream architecture is that despite the ubiquity of bifurcation (Kennedy and Bullier, 1985), in no layer do individual neurons in FF and FB pathways possess both up and downstream collaterals (Markov et al., 2014b). Similar findings hold for mouse (Berezovskii et al., 2011). This indicates that FF and FB cells indeed constitute distinct populations.</p>                                                                                                                                                                                                                                                                                                                                   | <p>Molecular characterization of FF and FB neurons is very much on the agenda. This would lead to the development of markers of these two projection types and hold the promise of the development of genetic tools for independent manipulation of different FB pathways.</p>                                                                                                                                                                                                                                                                                                                                                                                                                                                                                                                                                                                                                                                                  |
| <p>(2) <i>Large variability in the laminar configuration of FB pathways</i>. FF connections are highly stereotypical, while FB projections show a large variability in their laminar origins and targets. Retrograde tracer in a midlevel target area labels up- and downstream areas with different proportions of supragranular neurons according to their hierarchical distance (<b>Figure 10C</b>). These laminar distributions of FF and FB neurons constitute their signatures that allow areas to be ranked in the Felleman and Van Essen hierarchy. Importantly, the different signatures of hierarchical distance reflect the changing laminar composition of the long-distance inputs to an area, meaning that “hierarchy” refers to the distance-dependent laminar-constrained integration of FF and FB inputs (Barone et al., 2000; Markov et al., 2014b) and signals (Bastos et al., 2015b; Michalareas et al., 2016) into the canonical</p> | <p>The multiplicity of the FB pathways in terms of laminar origins and targets over different distances suggest that compared to the singularity of FF pathways, individual FB pathways come in different flavors and fulfill different functions. These different FB pathways need to be investigated in human and NHP in high-field, laminar resolution fMRI and in parallel using invasive electrophysiology in NHP. These functional investigations are of particular relevance to the supragranular counterstream given the unique features of the Primate supragranular layers which are generated by a primate-specific germinal zone (OSVZ) (Smart et al., 2002), that exhibits complex cell lineages (Lukaszewicz et al., 2005) that we have hypothesized generate unique cell features in primates (Dehay et al., 2015) (Harris and Shepherd, 2015). These considerations support the notion that the two FB pathways (one in the</p> |

|                                                                                                                                                                                                                                                                                                                                                                                                                                                                                                                                                                                                                    |                                                                                                                                                                                                                                                                                                                                           |
|--------------------------------------------------------------------------------------------------------------------------------------------------------------------------------------------------------------------------------------------------------------------------------------------------------------------------------------------------------------------------------------------------------------------------------------------------------------------------------------------------------------------------------------------------------------------------------------------------------------------|-------------------------------------------------------------------------------------------------------------------------------------------------------------------------------------------------------------------------------------------------------------------------------------------------------------------------------------------|
| <p>microcircuit.</p>                                                                                                                                                                                                                                                                                                                                                                                                                                                                                                                                                                                               | <p>supra- and one in infragranular layers) will have distinct functional roles in generative networks.</p>                                                                                                                                                                                                                                |
| <p>(3) <i>FB and FF are not serially organized.</i> Computational modeling studies e.g. (Bastos et al., 2012) invariably assume a serial hierarchical organization (<b>Figure 10C</b>) whereas in fact most areas receive and project to most other areas (Markov et al., 2014b).</p>                                                                                                                                                                                                                                                                                                                              | <p>The non-serial nature of inter-areal connectivity raises difficulty for ongoing attempts at large-scale computational modeling that needs to be given further attention.</p>                                                                                                                                                           |
| <p>(5) <i>Lamination</i> The dual counterstream architecture explicitly links pathways to layers, which is in-line with the increasing importance attached to cortical lamination and connectivity (Senzai, 2019). (1): effects on topography of FB. In addition to the low divergence-convergence values of supragranular layers (L2 FB and L3FF), and the high divergence-convergence values of infragranular layers (L5 FF and L6FB), high-rates of bifurcation by L6/L5 ensures innervation of multiple areas contrasting with and low levels of bifurcation by L2/L3 neurons (Kennedy and Bullier, 1985).</p> | <p>There are two interrelated issues here. Present understating of inter-areal connectivity in NHP, crucially lacks insight into the laminar restricted connectivity of these pathways. This requires using viral tracers in order to obtain precise information on the connectivity of individual pathways over different distances.</p> |
| <p>(6) <i>Differences of FB and FF targets.</i> The L3 FF projections primarily target upstream interneurons in L4. Presently we do not know the cellular targets of L2 FB projections although there is some suggestion that they could principally target L2 FB neurons in downstream areas, leading to long inter-areal FB chains. In parallel with differences in FF and FB cellular targets, do the cell targets change (and how) as a function of connection distance, possibly bringing a solution to addressing the problem raised in point (3)?</p>                                                       | <p>Laminar restricted connectivity to different cell types needs to be investigated in rodents and primates using next generation of viral tracers.</p>                                                                                                                                                                                   |
| <p>(7) <i>FB show distinct development strategies.</i> Differences in functionality are expected to require different developmental programs, which is indeed the case for FF and FB pathways. FF pathways develop precociously and exhibit directed-growth; FB pathway formation is delayed well into the postnatal period and exhibits diffuse growth followed by pruning (Barone et al., 1995; Barone et al., 1996; Kennedy et al., 1989).</p>                                                                                                                                                                  | <p>These observations invite the investigation of inter-areal processing in NHP at different developmental periods and suggest that high-field, laminar resolution fMRI in infants and adults could reveal important developmental processes.</p>                                                                                         |

## 808 **9. Conclusion.**

809 We have shown that cortical hierarchy can be defined by connectivity gradients and  
810 the functional correlates of these gradients. In other words, inputs to a cortical area sample the  
811 cortical sheet in a principled manner defined by the differential space constants of the distance  
812 rules governing the individual cortical layers. This approach to understanding hierarchy is  
813 anchored in the recognition that it is the activity and connectivity linking neurons across the  
814 cortex that will ultimately reveal the process underlying the dynamics of cortical function.  
815 Link based investigation is complemented by characterization of the nodes. Helen Barbas  
816 pioneered the structural model, which shows that laminar differentiation allows hierarchical  
817 ranking of cortical areas that correlates well with connectivity patterns (Barbas, 2015).  
818 Exploitation of the structural model has proved to be particularly rich because it allows  
819 ranking of cortical areas via gradual variations of cytoarchitecture and myeloarchitecture  
820 (Sanides, 1972). This has opened the interpretation of large-scale models of the cortex to  
821 investigation with non-invasive imaging techniques that can be applied to the human brain  
822 (Burt et al., 2018; Margulies et al., 2016; Paquola et al., 2019).

823 The central argument of this review is that cortical hierarchy can be usefully thought  
824 of as the gradual changes in the cortical input requirements of the local cortical circuit that in  
825 terms of synaptic mass constitutes the powerhouse of the cortex. Understanding the cellular  
826 mechanisms underlying hierarchical processing require investigations of hierarchy in terms of  
827 the laminar restricted connectivity and physiology that we have advocated in this review and  
828 described in Box 1. It is nearly 15 years since Jean Bullier posed the question “What is fed  
829 back?” (Bullier, 2006). The multiplicity of FB pathways and the complexity of their proposed  
830 functions were deep issues that he felt needed to be addressed. In the last 15 years there has  
831 been a spectacular development of three classes of techniques that now allow us to address  
832 Jean Bullier’s question. Firstly, optogenetics holographic stimulation makes it possible to  
833 address causation (Carrillo-Reid et al., 2019; Marshel et al., 2019), thereby addressing how  
834 activation of a given FB pathway influences a particular cognitive task. Secondly, viral  
835 tracing allows cell-type and laminar-constrained connectivity (El-Shamayleh et al., 2016;  
836 Nassi et al., 2015) making it possible to resolve the dual counterstream architecture. Thirdly,  
837 high-resolution fMRI allows single-layer resolution in the human brain (Kemper et al., 2018).  
838 The key feature will be to examine FB modulation of cognitive tasks in animal models that  
839 can, in parallel, be applied in humans where perceptual consequences can be reported (Kok et  
840 al., 2016; Schneider et al., 2019). These combined approaches will address the complexity of

841 the interaction of descending generative networks with the local microcircuit (Haeusler and  
842 Maass, 2007) allowing computational modeling of top-down information flow.

843 The interactions of generative networks with ascending pathways will be largely in  
844 supragranular cortical layers, which have been shown to be a major target for human  
845 evolutionary adaptation (Heide et al., 2020; Won et al., 2019). The evolutionary expansion of  
846 the supragranular layers is accompanied by an increase in heterogeneity of glutamergic cell-  
847 types in terms of morphology, electrophysiology and gene expression going from rodent to  
848 human (Berg et al., 2020) in turn supporting a complexification of the circuits in these layers  
849 (Hodge et al., 2019). The amplification and diversification of supragranular  
850 intratelencephalic-projecting neurons in primates suggest that the investigation of the biology  
851 of the generative networks advocated here may well exploit reductionist approaches in the  
852 rodent model, but will need nonetheless to be studied with a particular emphasis on human  
853 and non-human primates.

854

#### 855 **Acknowledgments.**

856 We would like to thank Kevan Martin and Rodney Douglas for numerous and often  
857 passionate discussions on some of the central issues discussed here and for their thoughtful  
858 comments on the text. Funding gratefully acknowledged by XJW (ONR Grant N00014-17-1-  
859 2041, US National Institutes of Health NIH grant 062349, Simons Collaboration on the  
860 Global Brain program grant 543057SPI); KK (DUAL\_STREAM ANR-19-CE37-0025); MV  
861 (ERC Starting Grant SPATEMP, BMF BINDA-031L0167); HK (LABEX CORTEX ANR-  
862 11-LABX-0042; Université de Lyon ANR-11-IDEX-0007), A2P2MC ANR-17-NEUC-0004,  
863 CORTICITY ANR-17-HBPR-0003, SCUSI, Région Auvergne-Rhône-Alpes 1700933701.

864

865 **Author contribution.** Data acquisition JV, LM; Analysis of data JV, LM, KK; Statistical  
866 modeling of hierarchy KK; Wrote the paper XJW, KK, MV, HK; All authors revised and  
867 edited the completed document; Proposed the study HK

868

#### 869 **References**

870 Ardid, S., Wang, X.J., 2013. A tweaking principle for executive control: neuronal circuit  
871 mechanism for rule-based task switching and conflict resolution. *J Neurosci* 33, 19504-  
872 19517.

873 Armstrong, K.M., Fitzgerald, J.K., Moore, T., 2006. Changes in visual receptive fields with  
874 microstimulation of frontal cortex. *Neuron* 50, 791-798.

- 875 Badre, D., D'Esposito, M., 2007. Functional magnetic resonance imaging evidence for a  
876 hierarchical organization of the prefrontal cortex. *J Cogn Neurosci* 19, 2082-2099.
- 877 Badre, D., D'Esposito, M., 2009. Is the rostro-caudal axis of the frontal lobe hierarchical? *Nat*  
878 *Rev Neurosci* 10, 659-669.
- 879 Barbas, H., 2015. General cortical and special prefrontal connections: principles from  
880 structure to function. *Annu Rev Neurosci* 38, 269-289.
- 881 Barone, P., Batardiere, A., Knoblauch, K., Kennedy, H., 2000. Laminar distribution of  
882 neurons in extrastriate areas projecting to visual areas V1 and V4 correlates with the  
883 hierarchical rank and indicates the operation of a distance rule. *J Neurosci* 20, 3263-  
884 3281.
- 885 Barone, P., Dehay, C., Berland, M., Bullier, J., Kennedy, H., 1995. Developmental  
886 remodeling of primate visual cortical pathways. *Cereb Cortex* 5, 22-38.
- 887 Barone, P., Dehay, C., Berland, M., Kennedy, H., 1996. Role of directed growth and target  
888 selection in the formation of cortical pathways: prenatal development of the projection  
889 of area V2 to area V4 in the monkey. *J Comp Neurol* 374, 1-20.
- 890 Barth, A.L., Poulet, J.F., 2012. Experimental evidence for sparse firing in the neocortex.  
891 *Trends Neurosci* 35, 345-355.
- 892 Bashivan, P., Kar, K., DiCarlo, J.J., 2019. Neural population control via deep image  
893 synthesis. *Science* 364.
- 894 Bastos, A.M., Litvak, V., Moran, R., Bosman, C.A., Fries, P., Friston, K.J., 2015a. A DCM  
895 study of spectral asymmetries in feedforward and feedback connections between visual  
896 areas V1 and V4 in the monkey. *Neuroimage* 108, 460-475.
- 897 Bastos, A.M., Loonis, R., Kornblith, S., Lundqvist, M., Miller, E.K., 2018. Laminar  
898 recordings in frontal cortex suggest distinct layers for maintenance and control of  
899 working memory. *Proc Natl Acad Sci U S A* 115, 1117-1122.
- 900 Bastos, A.M., Usrey, W.M., Adams, R.A., Mangun, G.R., Fries, P., Friston, K.J., 2012.  
901 Canonical microcircuits for predictive coding. *Neuron* 76, 695-711.
- 902 Bastos, A.M., Vezoli, J., Bosman, C.A., Schoffelen, J.M., Oostenveld, R., Dowdall, J.R., De  
903 Weerd, P., Kennedy, H., Fries, P., 2015b. Visual Areas Exert Feedforward and  
904 Feedback Influences through Distinct Frequency Channels. *Neuron* 85, 390-401.
- 905 Batista-Brito, R., Zaghera, E., Ratliff, J.M., Vinck, M., 2018. Modulation of cortical circuits by  
906 top-down processing and arousal state in health and disease. *Curr Opin Neurobiol* 52,  
907 172-181.

- 908 Battaglia, P.W., Hamrick, J.B., Tenenbaum, J.B., 2013. Simulation as an engine of physical  
909 scene understanding. *Proc Natl Acad Sci U S A* 110, 18327-18332.
- 910 Berezovskii, V.K., Nassi, J.J., Born, R.T., 2011. Segregation of feedforward and feedback  
911 projections in mouse visual cortex. *J Comp Neurol* 519, 3672-3683.
- 912 Berg, J., Sorensen, S.A., Ting, J.T., Miller, J.A., Chartrand, T., Buchin, A., Bakken, T.E.,  
913 Budzillo, A., Dee, N., Ding, S.-L., Gouwens, N.W., Hodge, R.D., Kalmbach, B., Lee,  
914 C., Lee, B.R., Alfiler, L., Baker, K., Barkan, E., Beller, A., Berry, K., Bertagnolli, D.,  
915 Bickley, K., Bomben, J., Braun, T., Brouner, K., Casper, T., Chong, P., Crichton, K.,  
916 Dalley, R., de Frates, R., Desta, T., Dingman Lee, S., D’Orazi, F., Dotson, N., Egdorf,  
917 T., Enstrom, R., Farrell, C., Feng, D., Fong, O., Furdan, S., Galakhova, A.A., Gamlin,  
918 C., Gary, A., Glandon, A., Goldy, J., Gorham, M., Goriounova, N.A., Gratiy, S.,  
919 Graybuck, L., Gu, H., Hadley, K., Hansen, N., Heistek, T.S., Henry, A.M., Heyer, D.B.,  
920 Hill, D., Hill, C., Hupp, M., Jarsky, T., Kebede, S., Keene, L., Kim, L., Kim, M.-H.,  
921 Kroll, M., Latimer, C., Levi, B.P., Link, K.E., Mallory, M., Mann, R., Marshall, D.,  
922 Maxwell, M., McGraw, M., McMillen, D., Melief, E., Mertens, E.J., Mezei, L., Mihut,  
923 N., Mok, S., Molnar, G., Mukora, A., Ng, L., Ngo, K., Nicovich, P.R., Nyhus, J., Olah,  
924 G., Oldre, A., Omstead, V., Ozsvar, A., Park, D., Peng, H., Pham, T., Pom, C.A.,  
925 Potekhina, L., Rajanbabu, R., Ransford, S., Reid, D., Rimorin, C., Ruiz, A., Sandman,  
926 D., Sulc, J., Sunkin, S.M., Szafer, A., Szemenyei, V., Thomsen, E.R., Tieu, M.,  
927 Torkelson, A., Trinh, J., Tung, H., Wakeman, W., Ward, K., Wilbers, R., Williams, G.,  
928 Yao, Z., Yoon, J.-G., Anastassiou, C., Arkhipov, A., Barzo, P., Bernard, A., Cobbs, C.,  
929 de Witt Hamer, P.C., Ellenbogen, R.G., Esposito, L., Ferreira, M., Gwinn, R.P.,  
930 Hawrylycz, M.J., Hof, P.R., Idema, S., Jones, A.R., Keene, C.D., Ko, A.L., Murphy,  
931 G.J., Ng, L., Ojemann, J.G., Patel, A.P., Phillips, J.W., Silbergeld, D.L., Smith, K.,  
932 Tasic, B., Yuste, R., Segev, I., de Kock, C.P.J., Mansvelder, H.D., Tamas, G., Zeng, H.,  
933 Koch, C., Lein, E.S., 2020. Human cortical expansion involves diversification and  
934 specialization of supragranular intratelencephalic-projecting neurons. *bioRxiv*,  
935 2020.2003.2031.018820.
- 936 Betizeau, M., Cortay, V., Patti, D., Pfister, S., Gautier, E., Bellemin-Menard, A., Afanassieff,  
937 M., Huissoud, C., Douglas, R.J., Kennedy, H., Dehay, C., 2013. Precursor diversity and  
938 complexity of lineage relationships in the outer subventricular zone (OSVZ) of the  
939 primate. *Neuron* 80, 442-457.
- 940 Binzegger, T., Douglas, R.J., Martin, K.A., 2004. A quantitative map of the circuit of cat  
941 primary visual cortex. *J Neurosci* 24, 8441-8453.

- 942 Binzegger, T., Douglas, R.J., Martin, K.A., 2009. Topology and dynamics of the canonical  
943 circuit of cat V1. *Neural Netw* 22, 1071-1078.
- 944 Bollimunta, A., Chen, Y., Schroeder, C.E., Ding, M., 2008. Neuronal mechanisms of cortical  
945 alpha oscillations in awake-behaving macaques. *J Neurosci* 28, 9976-9988.
- 946 Bonnefond, M., Kastner, S., Jensen, O., 2017. Communication between Brain Areas Based on  
947 Nested Oscillations. *eNeuro* 4.
- 948 Brovelli, A., Ding, M., Ledberg, A., Chen, Y., Nakamura, R., Bressler, S.L., 2004. Beta  
949 oscillations in a large-scale sensorimotor cortical network: directional influences  
950 revealed by Granger causality. *Proc Natl Acad Sci U S A* 101, 9849-9854.
- 951 Buffalo, E.A., Fries, P., Landman, R., Buschman, T.J., Desimone, R., 2011. Laminar  
952 differences in gamma and alpha coherence in the ventral stream. *Proc Natl Acad Sci U*  
953 *S A* 108, 11262-11267.
- 954 Bullier, J., 2006. What is Fed Back? In: van Hemmen, J.L., Sejnowski, T.J. (Eds.), 23  
955 Problems in Systems Neuroscience. Oxford University Press USA, pp. 103-132.
- 956 Burns, S.P., Xing, D., Shapley, R.M., 2011. Is gamma-band activity in the local field potential  
957 of V1 cortex a "clock" or filtered noise? *J Neurosci* 31, 9658-9664.
- 958 Burt, J.B., Demirtas, M., Eckner, W.J., Navejar, N.M., Ji, J.L., Martin, W.J., Bernacchia, A.,  
959 Anticevic, A., Murray, J.D., 2018. Hierarchy of transcriptomic specialization across  
960 human cortex captured by structural neuroimaging topography. *Nat Neurosci* 21, 1251-  
961 1259.
- 962 Buzsaki, G., Wang, X.J., 2012. Mechanisms of gamma oscillations. *Annu Rev Neurosci* 35,  
963 203-225.
- 964 Cahalane, D.J., Charvet, C.J., Finlay, B.L., 2014. Modeling local and cross-species neuron  
965 number variations in the cerebral cortex as arising from a common mechanism. *Proc*  
966 *Natl Acad Sci U S A* 111, 17642-17647.
- 967 Cardin, J.A., Carlen, M., Meletis, K., Knoblich, U., Zhang, F., Deisseroth, K., Tsai, L.H.,  
968 Moore, C.I., 2009. Driving fast-spiking cells induces gamma rhythm and controls  
969 sensory responses. *Nature* 459, 663-667.
- 970 Carrillo-Reid, L., Han, S., Yang, W., Akrouh, A., Yuste, R., 2019. Controlling Visually  
971 Guided Behavior by Holographic Recalling of Cortical Ensembles. *Cell* 178, 447-457  
972 e445.
- 973 Chaudhuri, R., Knoblauch, K., Gariel, M.A., Kennedy, H., Wang, X.J., 2015. A Large-Scale  
974 Circuit Mechanism for Hierarchical Dynamical Processing in the Primate Cortex.  
975 *Neuron* 88, 419-431.

- 976 Choi, E.Y., Drayna, G.K., Badre, D., 2018. Evidence for a Functional Hierarchy of  
977 Association Networks. *J Cogn Neurosci* 30, 722-736.
- 978 Cossell, L., Iacaruso, M.F., Muir, D.R., Houlton, R., Sader, E.N., Ko, H., Hofer, S.B., Mrsic-  
979 Flogel, T.D., 2015. Functional organization of excitatory synaptic strength in primary  
980 visual cortex. *Nature*.
- 981 Covic, E.N., Sherman, S.M., 2011. Synaptic properties of connections between the primary  
982 and secondary auditory cortices in mice. *Cereb Cortex* 21, 2425-2441.
- 983 Cragg, B.G., 1969. The topography of the afferent projections in the circumstriate visual  
984 cortex of the monkey studied by the Nauta method. *Vision Res* 9, 733-747.
- 985 Crick, F., Koch, C., 1998. Constraints on cortical and thalamic projections: the no-strong-  
986 loops hypothesis. *Nature* 391, 245-250.
- 987 Crochet, S., Poulet, J.F., Kremer, Y., Petersen, C.C., 2011. Synaptic mechanisms underlying  
988 sparse coding of active touch. *Neuron* 69, 1160-1175.
- 989 D'Souza, R., Wang, Q., Ji, W., Meier, A., Kennedy, H., Knoblauch, K., Burkhalter, A., 2020.  
990 Canonical and noncanonical features of the mouse visual cortical hierarchy. *bioRxiv*,  
991 2020.2003.2030.016303.
- 992 da Costa, N.M., Martin, K.A., 2010. Whose Cortical Column Would that Be? *Front*  
993 *Neuroanat* 4, 16.
- 994 de Lange, F.P., Heilbron, M., Kok, P., 2018. How Do Expectations Shape Perception? *Trends*  
995 *Cogn Sci* 22, 764-779.
- 996 De Pasquale, R., Sherman, S.M., 2011. Synaptic properties of corticocortical connections  
997 between the primary and secondary visual cortical areas in the mouse. *J Neurosci* 31,  
998 16494-16506.
- 999 Dehay, C., Kennedy, H., Kosik, K.S., 2015. The Outer Subventricular Zone and Primate-  
1000 Specific Cortical Complexification. *Neuron* 85, 683-694.
- 1001 Doron, G., Shin, J.N., Takahashi, N., Bocklisch, C., Skenderi, S., Drücke, M., de Mont, L.,  
1002 Toumazo, M., von Heimendahl, M., Brecht, M., Naud, R., Larkum, M.E., 2019.  
1003 Perirhinal input to neocortical layer 1 controls learning. *bioRxiv*, 713883.
- 1004 Douglas, R.J., Koch, C., Mahowald, M., Martin, K.A., Suarez, H.H., 1995. Recurrent  
1005 excitation in neocortical circuits. *Science* 269, 981-985.
- 1006 Douglas, R.J., Martin, K.A., 1991. A functional microcircuit for cat visual cortex. *J Physiol*  
1007 440, 735-769.
- 1008 Douglas, R.J., Martin, K.A., 2007a. Mapping the matrix: the ways of neocortex. *Neuron* 56,  
1009 226-238.



- 1010 Douglas, R.J., Martin, K.A., 2007b. Recurrent neuronal circuits in the neocortex. *Curr Biol*  
1011 17, R496-500.
- 1012 Douglas, R.J., Martin, K.A.C., Whitteridge, D., 1989. A canonical microcircuit for neocortex.  
1013 *Neural Comput* 1, 480-488.
- 1014 El-Shamayleh, Y., Ni, A.M., Horwitz, G.D., 2016. Strategies for targeting primate neural  
1015 circuits with viral vectors. *J Neurophysiol* 116, 122-134.
- 1016 Emmerling, T.C., Zimmermann, J., Sorger, B., Frost, M.A., Goebel, R., 2016. Decoding the  
1017 direction of imagined visual motion using 7T ultra-high field fMRI. *Neuroimage* 125,  
1018 61-73.
- 1019 Ercsey-Ravasz, M., Markov, N.T., Lamy, C., Van Essen, D.C., Knoblauch, K., Toroczkai, Z.,  
1020 Kennedy, H., 2013. A predictive network model of cerebral cortical connectivity based  
1021 on a distance rule. *Neuron* 80, 184-197.
- 1022 Felleman, D.J., Van Essen, D.C., 1991. Distributed hierarchical processing in the primate  
1023 cerebral cortex. *Cereb Cortex* 1, 1-47.
- 1024 Ferster, D., Chung, S., Wheat, H., 1996. Orientation selectivity of thalamic input to simple  
1025 cells of cat visual cortex. *Nature* 380, 249-252.
- 1026 Friston, K., 2018. Does predictive coding have a future? *Nat Neurosci* 21, 1019-1021.
- 1027 Geschwind, D.H., Rakic, P., 2013. Cortical evolution: judge the brain by its cover. *Neuron*  
1028 80, 633-647.
- 1029 Gilbert, C.D., Li, W., 2013. Top-down influences on visual processing. *Nat Rev Neurosci* 14,  
1030 350-363.
- 1031 Goulas, A., Uylings, H.B., Stiers, P., 2014. Mapping the hierarchical layout of the structural  
1032 network of the macaque prefrontal cortex. *Cereb Cortex* 24, 1178-1194.
- 1033 Gray, C.M., Konig, P., Engel, A.K., Singer, W., 1989. Oscillatory responses in cat visual  
1034 cortex exhibit inter-columnar synchronization which reflects global stimulus properties.  
1035 *Nature* 338, 334-337.
- 1036 Gregoriou, G.G., Gotts, S.J., Desimone, R., 2012. Cell-type-specific synchronization of  
1037 neural activity in FEF with V4 during attention. *Neuron* 73, 581-594.
- 1038 Gregoriou, G.G., Gotts, S.J., Zhou, H., Desimone, R., 2009. High-frequency, long-range  
1039 coupling between prefrontal and visual cortex during attention. *Science* 324, 1207-  
1040 1210.
- 1041 Haeusler, S., Maass, W., 2007. A statistical analysis of information-processing properties of  
1042 lamina-specific cortical microcircuit models. *Cereb Cortex* 17, 149-162.

- 1043 Hahn, G., Ponce-Alvarez, A., Deco, G., Aertsen, A., Kumar, A., 2019. Portraits of  
1044 communication in neuronal networks. *Nat Rev Neurosci* 20, 117-127.
- 1045 Haider, B., Hausser, M., Carandini, M., 2013. Inhibition dominates sensory responses in the  
1046 awake cortex. *Nature* 493, 97-100.
- 1047 Hamrick, J.B., 2019. Analogues of mental simulation and imagination in deep learning. *Curr*  
1048 *Opin Behav Sci* 29, 8-16.
- 1049 Harris, K.D., Mrsic-Flogel, T.D., 2013. Cortical connectivity and sensory coding. *Nature* 503,  
1050 51-58.
- 1051 Harris, K.D., Shepherd, G.M., 2015. The neocortical circuit: themes and variations. *Nat*  
1052 *Neurosci* 18, 170-181.
- 1053 Hasenstaub, A., Shu, Y., Haider, B., Kraushaar, U., Duque, A., McCormick, D.A., 2005.  
1054 Inhibitory postsynaptic potentials carry synchronized frequency information in active  
1055 cortical networks. *Neuron* 47, 423-435.
- 1056 Hawkins, J., Blakeslee, S., 2004. *On intelligence: How A New Understanding of the brain*  
1057 *will lad to the creation of truly intelligent machines.* Owl books.
- 1058 Heide, M., Haffner, C., Murayama, A., Kurotaki, Y., Shinohara, H., Okano, H., Sasaki, E.,  
1059 Huttner, W.B., 2020. Human-specific ARHGAP11B increases size and folding of  
1060 primate neocortex in the fetal marmoset. *Science*, eabb2401.
- 1061 Hilgetag, C.C., Goulas, A., 2020. 'Hierarchy' in the organization of brain networks. *Philos*  
1062 *Trans R Soc Lond B Biol Sci* 375, 20190319.
- 1063 Hinton, G.E., 2007. Learning multiple layers of representation. *Trends Cogn Sci* 11, 428-434.
- 1064 Hodge, R.D., Bakken, T.E., Miller, J.A., Smith, K.A., Barkan, E.R., Graybuck, L.T., Close,  
1065 J.L., Long, B., Johansen, N., Penn, O., Yao, Z., Eggermont, J., Holtt, T., Levi, B.P.,  
1066 Shehata, S.I., Aevermann, B., Beller, A., Bertagnolli, D., Brouner, K., Casper, T.,  
1067 Cobbs, C., Dalley, R., Dee, N., Ding, S.L., Ellenbogen, R.G., Fong, O., Garren, E.,  
1068 Goldy, J., Gwinn, R.P., Hirschstein, D., Keene, C.D., Keshk, M., Ko, A.L., Lathia, K.,  
1069 Mahfouz, A., Maltzer, Z., McGraw, M., Nguyen, T.N., Nyhus, J., Ojemann, J.G., Oldre,  
1070 A., Parry, S., Reynolds, S., Rimorin, C., Shapovalova, N.V., Somasundaram, S., Szafer,  
1071 A., Thomsen, E.R., Tieu, M., Quon, G., Scheuermann, R.H., Yuste, R., Sunkin, S.M.,  
1072 Lelieveldt, B., Feng, D., Ng, L., Bernard, A., Hawrylycz, M., Phillips, J.W., Tasic, B.,  
1073 Zeng, H., Jones, A.R., Koch, C., Lein, E.S., 2019. Conserved cell types with divergent  
1074 features in human versus mouse cortex. *Nature* 573, 61-68.
- 1075 Hu, H., Gan, J., Jonas, P., 2014. Interneurons. Fast-spiking, parvalbumin(+) GABAergic  
1076 interneurons: from cellular design to microcircuit function. *Science* 345, 1255263.

- 1077 Hubel, D., 1995. Eye, brain and vision. Freeman and Co, New York.
- 1078 Hubel, D.H., Wiesel, T.N., 1962. Receptive fields binocular interaction and functional  
1079 architecture in the cat visual cortex. *J Physiol* 160, 106-154.
- 1080 Hubel, D.H., Wiesel, T.N., 1977. Ferrier lecture. Functional architecture of macaque monkey  
1081 visual cortex. *Proc R Soc Lond B Biol Sci* 198, 1-59.
- 1082 Jouhanneau, J.S., Kremkow, J., Poulet, J.F.A., 2018. Single synaptic inputs drive high-  
1083 precision action potentials in parvalbumin expressing GABA-ergic cortical neurons in  
1084 vivo. *Nat Commun* 9, 1540.
- 1085 Kaas, J.H., Lin, C.S., 1977. Cortical projections of area 18 in owl monkeys. *Vision Res* 17,  
1086 739-741.
- 1087 Kemper, V.G., De Martino, F., Emmerling, T.C., Yacoub, E., Goebel, R., 2018. High  
1088 resolution data analysis strategies for mesoscale human functional MRI at 7 and 9.4T.  
1089 *Neuroimage* 164, 48-58.
- 1090 Kennedy, H., Bullier, J., 1985. A double-labeling investigation of the afferent connectivity to  
1091 cortical areas V1 and V2 of the macaque monkey. *J Neurosci* 5, 2815-2830.
- 1092 Kennedy, H., Bullier, J., Dehay, C., 1989. Transient projections from the superior temporal  
1093 sulcus to area 17 in the newborn macaque monkey. *Proc Natl Acad Sci USA* 86, 8093-  
1094 8097.
- 1095 Kietzmann, T.C., Spoerer, C.J., Sorensen, L.K.A., Cichy, R.M., Hauk, O., Kriegeskorte, N.,  
1096 2019. Recurrence is required to capture the representational dynamics of the human  
1097 visual system. *Proc Natl Acad Sci U S A* 116, 21854-21863.
- 1098 Klink, P.C., Dagnino, B., Gariel-Mathis, M.A., Roelfsema, P.R., 2017. Distinct Feedforward  
1099 and Feedback Effects of Microstimulation in Visual Cortex Reveal Neural Mechanisms  
1100 of Texture Segregation. *Neuron* 95, 209-220 e203.
- 1101 Ko, H., Hofer, S.B., Pichler, B., Buchanan, K.A., Sjöstrom, P.J., Mrsic-Flogel, T.D., 2011.  
1102 Functional specificity of local synaptic connections in neocortical networks. *Nature*  
1103 473, 87-91.
- 1104 Koechlin, E., Ody, C., Kouneiher, F., 2003. The architecture of cognitive control in the  
1105 human prefrontal cortex. *Science* 302, 1181-1185.
- 1106 Kok, P., Bains, L.J., van Mourik, T., Norris, D.G., de Lange, F.P., 2016. Selective Activation  
1107 of the Deep Layers of the Human Primary Visual Cortex by Top-Down Feedback. *Curr*  
1108 *Biol* 26, 371-376.
- 1109 Kosslyn, S.M., 1994. Image and Brain. MIT Press.

- 1110 Kuypers, H.G.J.M., Szwarcbart, M.K., Mishkin, M., Rosvold, H.E., 1965. Occipitotemporal  
1111 corticocortical connections in the rhesus monkey. *Exp Neurol* 11, 245-262.
- 1112 Latawiec, D., Martin, K.A., Meskenaite, V., 2000. Termination of the geniculocortical  
1113 projection in the striate cortex of macaque monkey: a quantitative immunoelectron  
1114 microscopic study. *J Comp Neurol* 419, 306-319.
- 1115 LeCun, Y., Bengio, Y., Hinton, G., 2015. Deep learning. *Nature* 521, 436-444.
- 1116 Lee, W.C., Bonin, V., Reed, M., Graham, B.J., Hood, G., Glattfelder, K., Reid, R.C., 2016.  
1117 Anatomy and function of an excitatory network in the visual cortex. *Nature* 532, 370-  
1118 374.
- 1119 Lesnoff, M., Lancelot, R., 2012. aod: Analysis of Overdispersed Data. R package version 1.3  
1120 <http://cran.r-project.org/package=aod>.
- 1121 Li, Z., 2002. A saliency map in primary visual cortex. *Trends Cogn Sci* 6, 9-16.
- 1122 Lien, A.D., Scanziani, M., 2013. Tuned thalamic excitation is amplified by visual cortical  
1123 circuits. *Nat Neurosci* 16, 1315-1323.
- 1124 Lukaszewicz, A., Savatier, P., Cortay, V., Giroud, P., Huissoud, C., Berland, M., Kennedy,  
1125 H., Dehay, C., 2005. G1 phase regulation, area-specific cell cycle control, and  
1126 cytoarchitectonics in the primate cortex. *Neuron* 47, 353-364.
- 1127 Lund, J.S., Lund, R.D., Hendrickson, A.E., Bunt, A.H., Fuchs, A.F., 1975. The origin of  
1128 efferent pathways from the primary visual cortex of the macaque monkey as shown by  
1129 retrograde transport of horseradish peroxydase. *J Comp Neurol* 164, 287-304.
- 1130 Magrou, L., Barone, P., Markov, N.T., Killackey, H.P., Giroud, P., Berland, M., Knoblauch,  
1131 K., Dehay, C., Kennedy, H., 2018. How Areal Specification Shapes the Local and  
1132 Interareal Circuits in a Macaque Model of Congenital Blindness. *Cereb Cortex* 28,  
1133 3017-3034.
- 1134 Margulies, D.S., Ghosh, S.S., Goulas, A., Falkiewicz, M., Huntenburg, J.M., Langs, G.,  
1135 Bezgin, G., Eickhoff, S.B., Castellanos, F.X., Petrides, M., Jefferies, E., Smallwood, J.,  
1136 2016. Situating the default-mode network along a principal gradient of macroscale  
1137 cortical organization. *Proc Natl Acad Sci U S A* 113, 12574-12579.
- 1138 Markov, N.T., Ercsey-Ravasz, M., Van Essen, D.C., Knoblauch, K., Toroczkai, Z., Kennedy,  
1139 H., 2013. Cortical high-density counter-stream architectures. *Science* 342, 1238406.
- 1140 Markov, N.T., Ercsey-Ravasz, M.M., Ribeiro Gomes, A.R., Lamy, C., Magrou, L., Vezoli, J.,  
1141 Misery, P., Falchier, A., Quilodran, R., Gariel, M.A., Sallet, J., Gamanut, R., Huissoud,  
1142 C., Clavagnier, S., Giroud, P., Sappey-Marinier, D., Barone, P., Dehay, C., Toroczkai,

- 1143 Z., Knoblauch, K., Van Essen, D.C., Kennedy, H., 2014a. A weighted and directed  
1144 interareal connectivity matrix for macaque cerebral cortex. *Cereb Cortex* 24, 17-36.
- 1145 Markov, N.T., Kennedy, H., 2013. The importance of being hierarchical. *Curr Opin*  
1146 *Neurobiol* 23, 187-194.
- 1147 Markov, N.T., Misery, P., Falchier, A., Lamy, C., Vezoli, J., Quilodran, R., Gariel, M.A.,  
1148 Giroud, P., Ercsey-Ravasz, M., Pilaz, L.J., Huissoud, C., Barone, P., Dehay, C.,  
1149 Toroczkai, Z., Van Essen, D.C., Kennedy, H., Knoblauch, K., 2011. Weight  
1150 Consistency Specifies Regularities of Macaque Cortical Networks. *Cereb Cortex* 21,  
1151 1254-1272.
- 1152 Markov, N.T., Vezoli, J., Chameau, P., Falchier, A., Quilodran, R., Huissoud, C., Lamy, C.,  
1153 Misery, P., Giroud, P., Barone, P., Dehay, C., Ullman, S., Knoblauch, K., Kennedy, H.,  
1154 2014b. The Anatomy of Hierarchy: Feedforward and feedback pathways in macaque  
1155 visual cortex. *J Comp Neurol* 522, 225-259.
- 1156 Marshel, J.H., Kim, Y.S., Machado, T.A., Quirin, S., Benson, B., Kadmon, J., Raja, C.,  
1157 Chibukhchyan, A., Ramakrishnan, C., Inoue, M., Shane, J.C., McKnight, D.J.,  
1158 Yoshizawa, S., Kato, H.E., Ganguli, S., Deisseroth, K., 2019. Cortical layer-specific  
1159 critical dynamics triggering perception. *Science* 365.
- 1160 Martinez-Millan, L., Hollander, H., 1975. Cortico-cortical projections from striate cortex of  
1161 the squirrel monkey (*saimiri sciureus*). A radioautographic study. *Brain Res* 83, 405-  
1162 417.
- 1163 McAdams, C.J., Maunsell, J.H., 1999. Effects of attention on orientation-tuning functions of  
1164 single neurons in macaque cortical area V4. *J Neurosci* 19, 431-441.
- 1165 Mejias, J.F., Murray, J.D., Kennedy, H., Wang, X.J., 2016. Feedforward and feedback  
1166 frequency-dependent interactions in a large-scale laminar network of the primate cortex.  
1167 *Sci Adv* 2, e1601335.
- 1168 Michalareas, G., Vezoli, J., van Pelt, S., Schoffelen, J.M., Kennedy, H., Fries, P., 2016.  
1169 Alpha-Beta and Gamma Rhythms Subserve Feedback and Feedforward Influences  
1170 among Human Visual Cortical Areas. *Neuron* 89, 384-397.
- 1171 Moore, C.I., Carlen, M., Knoblich, U., Cardin, J.A., 2010. Neocortical interneurons: from  
1172 diversity, strength. *Cell* 142, 189-193.
- 1173 Moore, T., Armstrong, K.M., 2003. Selective gating of visual signals by microstimulation of  
1174 frontal cortex. *Nature* 421, 370-373.
- 1175 Mountcastle, V., 1995. The evolution of ideas concerning the function of the neocortex.  
1176 *Cerebral cortex* 5, 289-295.

- 1177 Mountcastle, V.B., 1957. Modality and topographic properties of single neurons of cat's  
1178 somatic sensory cortex. *J Neurophysiol* 20, 408-434.
- 1179 Mumford, D., 1992. On the computational architecture of the neocortex. II. The role of  
1180 cortico-cortical loops. *Biol Cybern* 66, 241-251.
- 1181 Naselaris, T., Olman, C.A., Stansbury, D.E., Ugurbil, K., Gallant, J.L., 2015. A voxel-wise  
1182 encoding model for early visual areas decodes mental images of remembered scenes.  
1183 *Neuroimage* 105, 215-228.
- 1184 Nassi, J.J., Cepko, C.L., Born, R.T., Beier, K.T., 2015. Neuroanatomy goes viral! *Front*  
1185 *Neuroanat* 9, 80.
- 1186 Nayebi, A., Bear, D., Kumbhani, J., Kar, K., Ganguli, S., Sussillo, D., DiCarlo, J.J., Yamins,  
1187 D.L.K., 2018. Task-Driven convolutional recurrent models of the visual system.  
1188 NIPS'18 Proceedings of the 32nd International Conference on Neural Information  
1189 Processing Systems, pp. 5295-5306.
- 1190 Paquola, C., Vos De Wael, R., Wagstyl, K., Bethlehem, R.A.I., Hong, S.J., Seidlitz, J.,  
1191 Bullmore, E.T., Evans, A.C., Miskic, B., Margulies, D.S., Smallwood, J., Bernhardt,  
1192 B.C., 2019. Microstructural and functional gradients are increasingly dissociated in  
1193 transmodal cortices. *PLoS Biol* 17, e3000284.
- 1194 Petersen, C.C., Crochet, S., 2013. Synaptic computation and sensory processing in neocortical  
1195 layer 2/3. *Neuron* 78, 28-48.
- 1196 Pike, F.G., Goddard, R.S., Suckling, J.M., Ganter, P., Kasthuri, N., Paulsen, O., 2000.  
1197 Distinct frequency preferences of different types of rat hippocampal neurones in  
1198 response to oscillatory input currents. *J Physiol* 529 Pt 1, 205-213.
- 1199 Pouget, P., Stepniewska, I., Crowder, E.A., Leslie, M.W., Emeric, E.E., Nelson, M.J., Schall,  
1200 J.D., 2009. Visual and motor connectivity and the distribution of calcium-binding  
1201 proteins in macaque frontal eye field: implications for saccade target selection. *Front*  
1202 *Neuroanat* 3, 2.
- 1203 Rao, R.P., Ballard, D.H., 1999. Predictive coding in the visual cortex: a functional  
1204 interpretation of some extra-classical receptive-field effects. *Nat Neurosci* 2, 79-87.
- 1205 Richards, B.A., Lillicrap, T.P., Beaudoin, P., Bengio, Y., Bogacz, R., Christensen, A.,  
1206 Clopath, C., Costa, R.P., de Berker, A., Ganguli, S., Gillon, C.J., Hafner, D., Kepecs,  
1207 A., Kriegeskorte, N., Latham, P., Lindsay, G.W., Miller, K.D., Naud, R., Pack, C.C.,  
1208 Poirazi, P., Roelfsema, P., Sacramento, J., Saxe, A., Scellier, B., Schapiro, A.C., Senn,  
1209 W., Wayne, G., Yamins, D., Zenke, F., Zylberberg, J., Therien, D., Kording, K.P.,  
1210 2019. A deep learning framework for neuroscience. *Nat Neurosci* 22, 1761-1770.

- 1211 Richter, C.G., Coppola, R., Bressler, S.L., 2018. Top-down beta oscillatory signaling conveys  
1212 behavioral context in early visual cortex. *Sci Rep* 8, 6991.
- 1213 Rockland, K.S., Pandya, D.N., 1979. Laminar origins and terminations of cortical connections  
1214 of the occipital lobe in the rhesus monkey. *Brain Res* 179, 3-20.
- 1215 Roelfsema, P.R., de Lange, F.P., 2016. Early Visual Cortex as a Multiscale Cognitive  
1216 Blackboard. *Annu Rev Vis Sci* 2, 131-151.
- 1217 Sakata, S., Harris, K.D., 2009. Laminar structure of spontaneous and sensory-evoked  
1218 population activity in auditory cortex. *Neuron* 64, 404-418.
- 1219 Sanides, F., 1972. Representation in the cerebral cortex and its areal lamination patterns. In:  
1220 Bourne, G.H. (Ed.), *The structure and function of the nervous tissue*. Academic Press,  
1221 New York and London, pp. 329-453.
- 1222 Schall, J.D., 2015. Visuomotor Functions in the Frontal Lobe. *Annu Rev Vis Sci* 1, 469-498.
- 1223 Scherberger, H., Jarvis, M.R., Andersen, R.A., 2005. Cortical local field potential encodes  
1224 movement intentions in the posterior parietal cortex. *Neuron* 46, 347-354.
- 1225 Schneider, M., Kemper, V.G., Emmerling, T.C., De Martino, F., Goebel, R., 2019. Columnar  
1226 clusters in the human motion complex reflect consciously perceived motion axis. *Proc*  
1227 *Natl Acad Sci U S A* 116, 5096-5101.
- 1228 Schumacher, F.K., Schumacher, L.V., Schelter, B.O., Kaller, C.P., 2019. Functionally  
1229 dissociating ventro-dorsal components within the rostro-caudal hierarchical  
1230 organization of the human prefrontal cortex. *Neuroimage* 185, 398-407.
- 1231 Senden, M., Emmerling, T.C., van Hoof, R., Frost, M.A., Goebel, R., 2019. Reconstructing  
1232 imagined letters from early visual cortex reveals tight topographic correspondence  
1233 between visual mental imagery and perception. *Brain Struct Funct* 224, 1167-1183.
- 1234 Senzai, Y., Fernandez, A., Buzaki, G., 2019. Layer specific physiological features and  
1235 interlaminar interactions in the primary visual cortex of the mouse. *Neuron* 101, 500-  
1236 503.
- 1237 Shipp, S., 2016. Neural Elements for Predictive Coding. *Front Psychol* 7, 1792.
- 1238 Slotnick, S.D., Thompson, W.L., Kosslyn, S.M., 2005. Visual mental imagery induces  
1239 retinotopically organized activation of early visual areas. *Cereb Cortex* 15, 1570-1583.
- 1240 Smart, I.H., Dehay, C., Giroud, P., Berland, M., Kennedy, H., 2002. Unique morphological  
1241 features of the proliferative zones and postmitotic compartments of the neural  
1242 epithelium giving rise to striate and extrastriate cortex in the monkey. *Cereb Cortex* 12,  
1243 37-53.

- 1244 Song, S., Sjostrom, P.J., Reigl, M., Nelson, S., Chklovskii, D.B., 2005. Highly nonrandom  
1245 features of synaptic connectivity in local cortical circuits. *PLoS Biol* 3, e68.
- 1246 Sousa, A.M.M., Meyer, K.A., Santpere, G., Gulden, F.O., Sestan, N., 2017. Evolution of the  
1247 Human Nervous System Function, Structure, and Development. *Cell* 170, 226-247.
- 1248 Spatz, W.B., Tigges, J., Tigges, M., 1970. Subcortical projections, cortical associations, and  
1249 some intrinsic interlaminar connections of the striate cortex in the squirrel monkey  
1250 (saimiri). *J Comp Neurol* 140, 155-174.
- 1251 Spyropoulos, G., Dowdall, J.R., Schölvinck, M.L., Bosman, C.A., Lima, B., Peter, A.,  
1252 Onorato, I., Klon-Lipok, J., Roese, R., Neuenschwander, S., Singer, W., Vinck, M.,  
1253 Fries, P., 2019. Gamma-cycle duration predicts instantaneous amplitude, spike rate and  
1254 synchrony in macaque V1. *bioRxiv*, 793729.
- 1255 Tang, S., Zhang, Y., Li, Z., Li, M., Liu, F., Jiang, H., Lee, T.S., 2018. Large-scale two-photon  
1256 imaging revealed super-sparse population codes in the V1 superficial layer of awake  
1257 monkeys. *Elife* 7.
- 1258 Thirion, B., Duchesnay, E., Hubbard, E., Dubois, J., Poline, J.B., Lebihan, D., Dehaene, S.,  
1259 2006. Inverse retinotopy: inferring the visual content of images from brain activation  
1260 patterns. *Neuroimage* 33, 1104-1116.
- 1261 Tigges, J., Spatz, W.B., Tigges, M., 1973. Reciprocal point-to-point connections between  
1262 parastriate and striate cortex in the squirrel monkey (saimiri). *J Comp Neurol* 148, 481-  
1263 490.
- 1264 Treue, S., Maunsell, J.H., 1996. Attentional modulation of visual motion processing in  
1265 cortical areas MT and MST. *Nature* 382, 539-541.
- 1266 Tsodyks, M., Kenet, T., Grinvald, A., Arieli, A., 1999. Linking spontaneous activity of single  
1267 cortical neurons and the underlying functional architecture. *Science* 286, 1943-1946.
- 1268 Ullman, S., 1995. Sequence seeking and counter streams: a computational model for  
1269 bidirectional information flow in the visual cortex. *Cereb Cortex* 5, 1-11.
- 1270 Ullman, S., 2000. Sequence seeking and counter streams: A model for information flow in the  
1271 visual cortex. *High-Level Vision*. Bradford / MIT Press.
- 1272 Van Essen, D.C., Zeki, S., 1978. The topographic organization of rhesus monkey prestriate  
1273 cortex. *J Physiol* 277, 193-226.
- 1274 van Kerkoerle, T., Self, M.W., Dagnino, B., Gariel-Mathis, M.A., Poort, J., van der Togt, C.,  
1275 Roelfsema, P.R., 2014. Alpha and gamma oscillations characterize feedback and  
1276 feedforward processing in monkey visual cortex. *Proc Natl Acad Sci U S A* 111, 14332-  
1277 14341.



- 1278 Vezoli, J., Falchier, A., Jouve, B., Knoblauch, K., Young, M., Kennedy, H., 2004.  
1279 Quantitative analysis of connectivity in the visual cortex: extracting function from  
1280 structure. *Neuroscientist* 10, 476-482.
- 1281 Vinck, M., Bosman, C.A., 2016. More Gamma More Predictions: Gamma-Synchronization as  
1282 a Key Mechanism for Efficient Integration of Classical Receptive Field Inputs with  
1283 Surround Predictions. *Front Syst Neurosci* 10, 35.
- 1284 Vinje, W.E., Gallant, J.L., 2000. Sparse coding and decorrelation in primary visual cortex  
1285 during natural vision. *Science* 287, 1273-1276.
- 1286 Wang, X.-J., Kennedy, H., 2016. Brain structure and dynamics across scales: in search of  
1287 rules. *Curr Opin Neurobiol* 37, 92-98.
- 1288 Wang, X.J., 2010. Neurophysiological and computational principles of cortical rhythms in  
1289 cognition. *Physiol Rev* 90, 1195-1268.
- 1290 Whittington, J.C.R., Bogacz, R., 2019. Theories of Error Back-Propagation in the Brain.  
1291 *Trends Cogn Sci* 23, 235-250.
- 1292 Willmore, B.D., Mazer, J.A., Gallant, J.L., 2011. Sparse coding in striate and extrastriate  
1293 visual cortex. *J Neurophysiol* 105, 2907-2919.
- 1294 Won, H., Huang, J., Opland, C.K., Hartl, C.L., Geschwind, D.H., 2019. Human evolved  
1295 regulatory elements modulate genes involved in cortical expansion and  
1296 neurodevelopmental disease susceptibility. *Nat Commun* 10, 2396.
- 1297 Wong-Riley, M., 1978. Reciprocal connections between striate and prestriate cortex in the  
1298 squirrel monkey as demonstrated by combined peroxidase histochemistry and  
1299 autoradiography. *Brain Res* 147, 159-164.
- 1300 York, G.K., 3rd, Steinberg, D.A., 2011. Hughlings Jackson's neurological ideas. *Brain* 134,  
1301 3106-3113.
- 1302 Zeng, H., Shen, E.H., Hohmann, J.G., Oh, S.W., Bernard, A., Royall, J.J., Glattfelder, K.J.,  
1303 Sunkin, S.M., Morris, J.A., Guillozet-Bongaarts, A.L., Smith, K.A., Ebbert, A.J.,  
1304 Swanson, B., Kuan, L., Page, D.T., Overly, C.C., Lein, E.S., Hawrylycz, M.J., Hof,  
1305 P.R., Hyde, T.M., Kleinman, J.E., Jones, A.R., 2012. Large-scale cellular-resolution  
1306 gene profiling in human neocortex reveals species-specific molecular signatures. *Cell*  
1307 149, 483-496.
- 1308 Zipser, K., Lamme, V.A., Schiller, P.H., 1996. Contextual modulation in primary visual  
1309 cortex. *J Neurosci* 16, 7376-7389.
- 1310
- 1311

1312 **Figure & Legends**

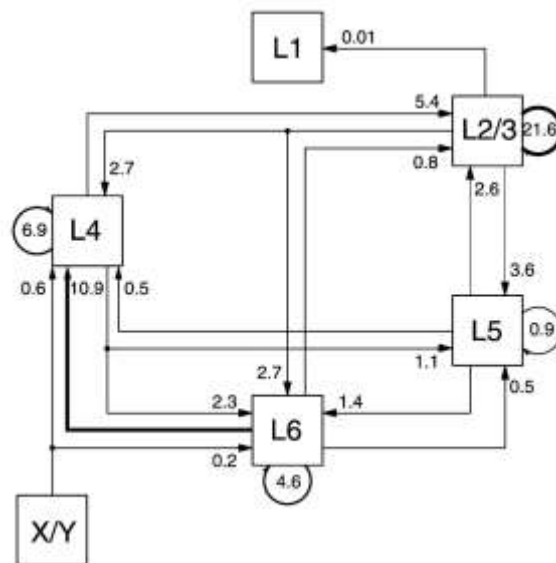

1313

1314

1315 **Figure 1. Quantitative map of excitatory synapses between excitatory neurons of the**  
1316 **local microcircuit in visual cortex (area 17) of the cat.** Numbers indicate proportions of  
1317 excitatory synapses, note the dominance of within layer recurrent connectivity with 21.6 peak  
1318 values in Layers 2/3. The FF loop starts in layer 4, the major thalamic recipient layer and then  
1319 extends to layers 2/3, 5 and 6 with recurrent inputs back to layer 4. This FF loop corresponds  
1320 to a little less than half of synapses involved in self-innervation of individual cortical layers.  
1321 X/Y refers to the component cells of the lateral geniculate nucleus, the major thalamic relay.  
1322 The original canonical microcircuit is shown in Figure 9B. L refers to layer. From (Binzegger  
1323 et al., 2004) with permission.

1324

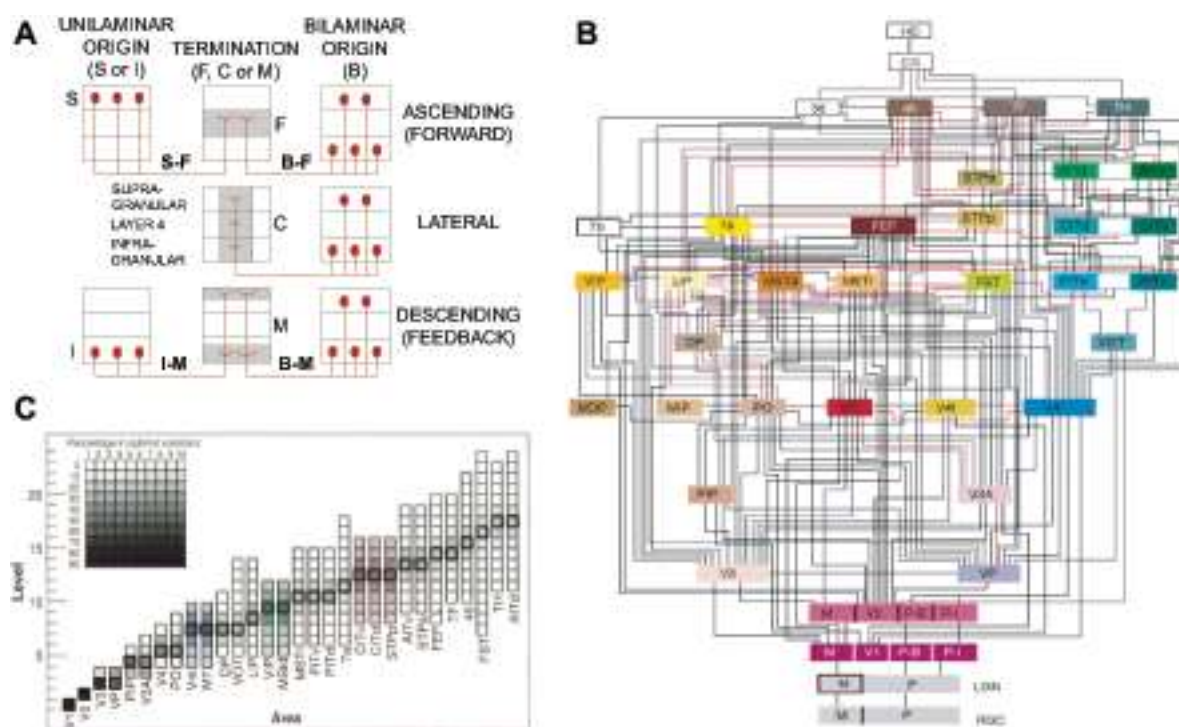

1325

1326

1327 **Figure 2 The Felleman and Van Essen binary model of cortical hierarchy.** **A)** Criteria for  
 1328 classifying connections between areas as FF (top), lateral (middle) and FB (bottom) row.  
 1329 Termination patterns are depicted in the central column, preferentially in layer 4 (F pattern)  
 1330 FF, across all layers (C pattern) lateral, in upper and lower layers avoiding layer 4 (M pattern)  
 1331 FB. Laminar origin from a single layer (left column), is either supragranular (S) and therefore  
 1332 FF, or infragranular (I) and therefore FB. Bilaminar (B) origins (right column) either  
 1333 terminate in the middle layers (F pattern) and are therefore FF, terminate in all layers (lateral)  
 1334 or terminate predominantly in upper supra- and infragranular layers (M pattern) and therefore  
 1335 FB. **B)** The binary hierarchical model. **C):** Area frequency distributions for 150,000 optimal  
 1336 hierarchical orderings (Hilgetag et al., 1996).

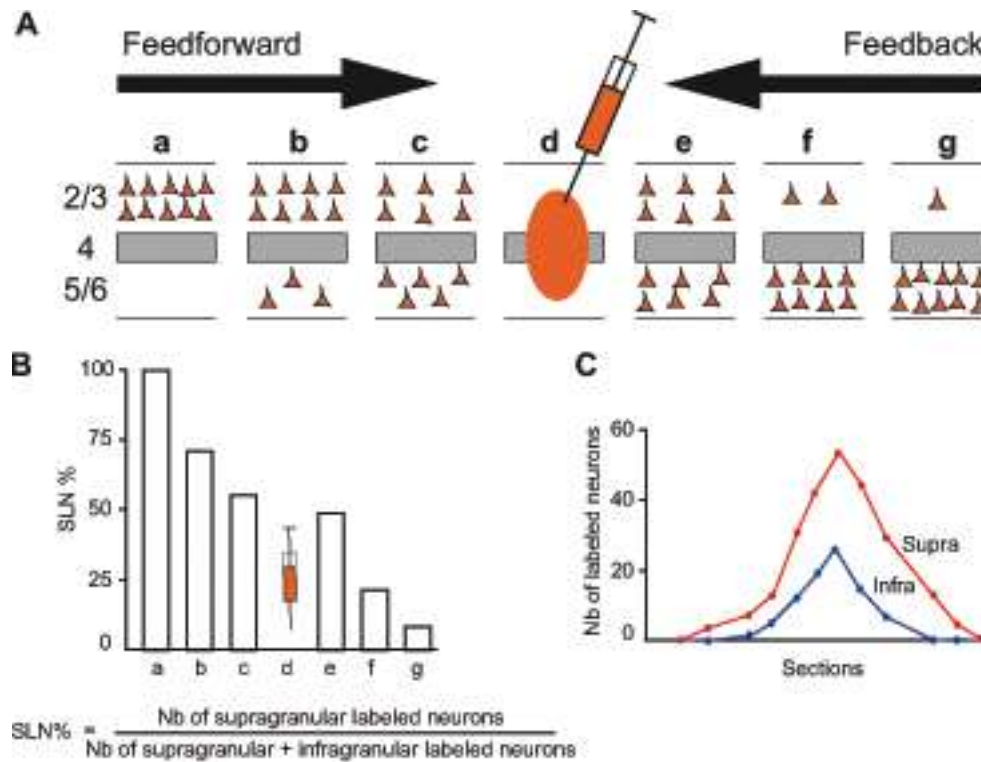

1337

1338

1339 **Figure 3. Quantitative parameters characterizing the hierarchy.** A) The laminar  
1340 distribution of parent neurons in each pathway, referred to as SLN (fraction of supragranular  
1341 neurons) is determined by high frequency sampling and quantitative analysis of labeling.  
1342 Supra- and infragranular layer neurons contribute to both FF and FB pathways, and their  
1343 relative proportion is characteristic for each type of pathway. For a given injection there is a  
1344 gradient of SLN of the labeled areas, between purely FF (SLN = 100%, all the parent neurons  
1345 are in the supragranular layers) to purely FB (SLN = 0%, all the parent neurons in the  
1346 infragranular layers) and a spectrum of intermediate proportions; **B**) All labeled areas can  
1347 then be ordered by decreasing SLN values and this order is consistent with hierarchical order  
1348 according to Felleman and Van Essen. SLN is thus used as an indicator of hierarchical  
1349 distance between areas from the same injection; **C**) Reliable estimation of SLN crucially  
1350 requires sampling labeling throughout the full extent of the projection zone in each area.

1351

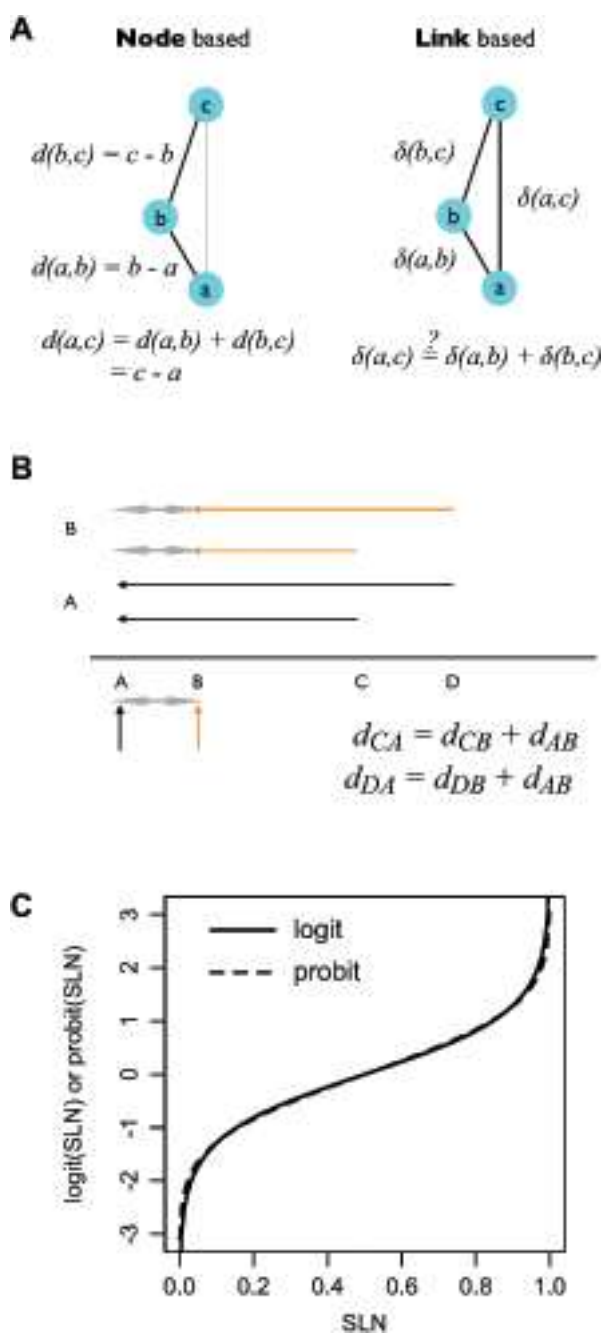

1352

1353

1354 **Figure 4. Properties of nodes and links.** Nodes have fixed properties, a, b, c which in turn  
 1355 fixes their order and any distance measure, d, calculated from these properties. b. Link  
 1356 properties depend on the relations between node pairs, ab, bc, ac. The distance measures,  $\delta$ ,  
 1357 for ab, and bc do not necessarily fix that for ac. The above graphs are unidirectional, but in bi-  
 1358 directional graphs the distances between nodes need not be symmetric. **B) Hierarchical**  
 1359 **scales.** Suppose a hierarchical scale between areas A, B, C, D, with the ordering and distances  
 1360 as illustrated on the bottom line. We expect measures of distance to be consistent measured  
 1361 between any pairs of areas. For example, injections in areas A and B lead to distances defined

1362 with respect to each of these areas, i.e., distances AB (double headed grey arrow), AC and  
1363 AD (black arrows) for injection in area A, and BA (double headed grey arrow), BC and BD  
1364 (orange arrows) for injection in area B. Consistency would imply, for example, that for a  
1365 distance measure,  $d$ , the estimate of  $d_{AB} = d_{BA}$  would be the same for both injections, i.e.,  $d_{CA}$   
1366  $- d_{CB} = d_{DA} - d_{DB}$ . **C) SLN Transformation.** Comparison of logit (solid) and probit (dashed)  
1367 transformations of SLN values on the interval (0, 1). The logit SLN is defined as  $\ln(\text{SLN}/(1 -$   
1368  $\text{SLN}))$ . The probit is defined as the inverse of the Gaussian cumulative distribution function  
1369 and is often notated by  $\Phi^{-1}$ . The scale factor of the logit curve has been adjusted by a factor  
1370 of 0.588 to match it to the probit curve.

1371

1372

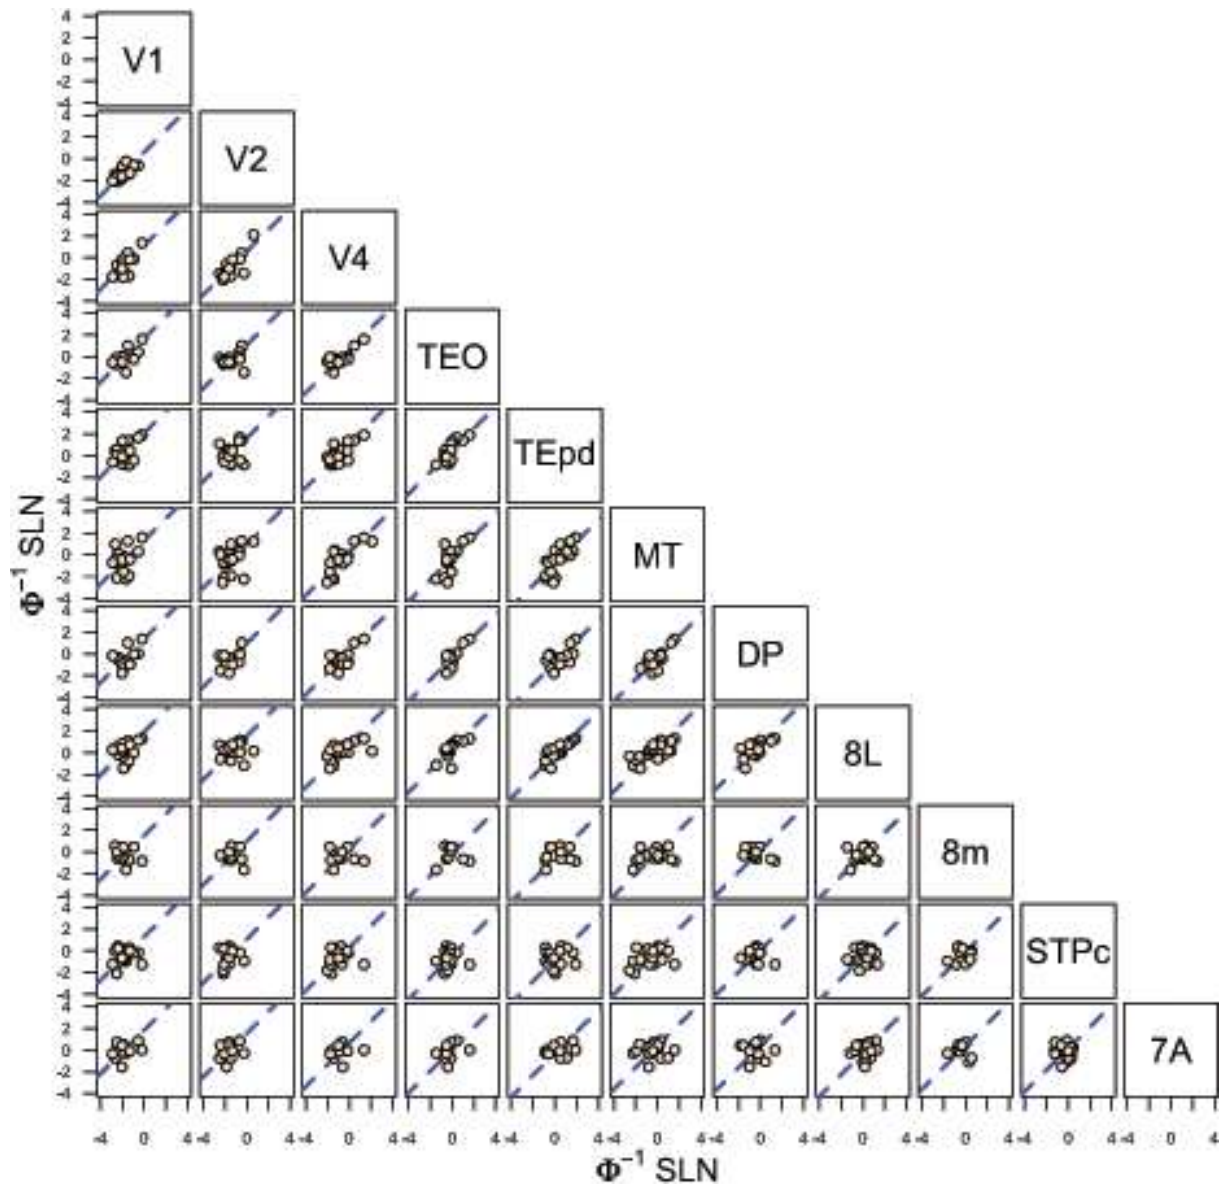

1373  
1374

1375

1376

1377

1378

1379

1380

1381

**Figure 5. Probit transformation.** Scatter plots of probit transformed SLN values of common source areas from pairs of 11 visual areas, obtained from retrograde tracer injections. The abscissa of each graph corresponds to the transformed SLN values of area  $i$ , indicated on the diagonal at the top of the column and the ordinate values are the transformed SLN values of area  $j$  indicated on the diagonal at the right of the row. The dashed blue line in each plot is the best fit line of unit slope (replotted from (Markov et al., 2014b)).

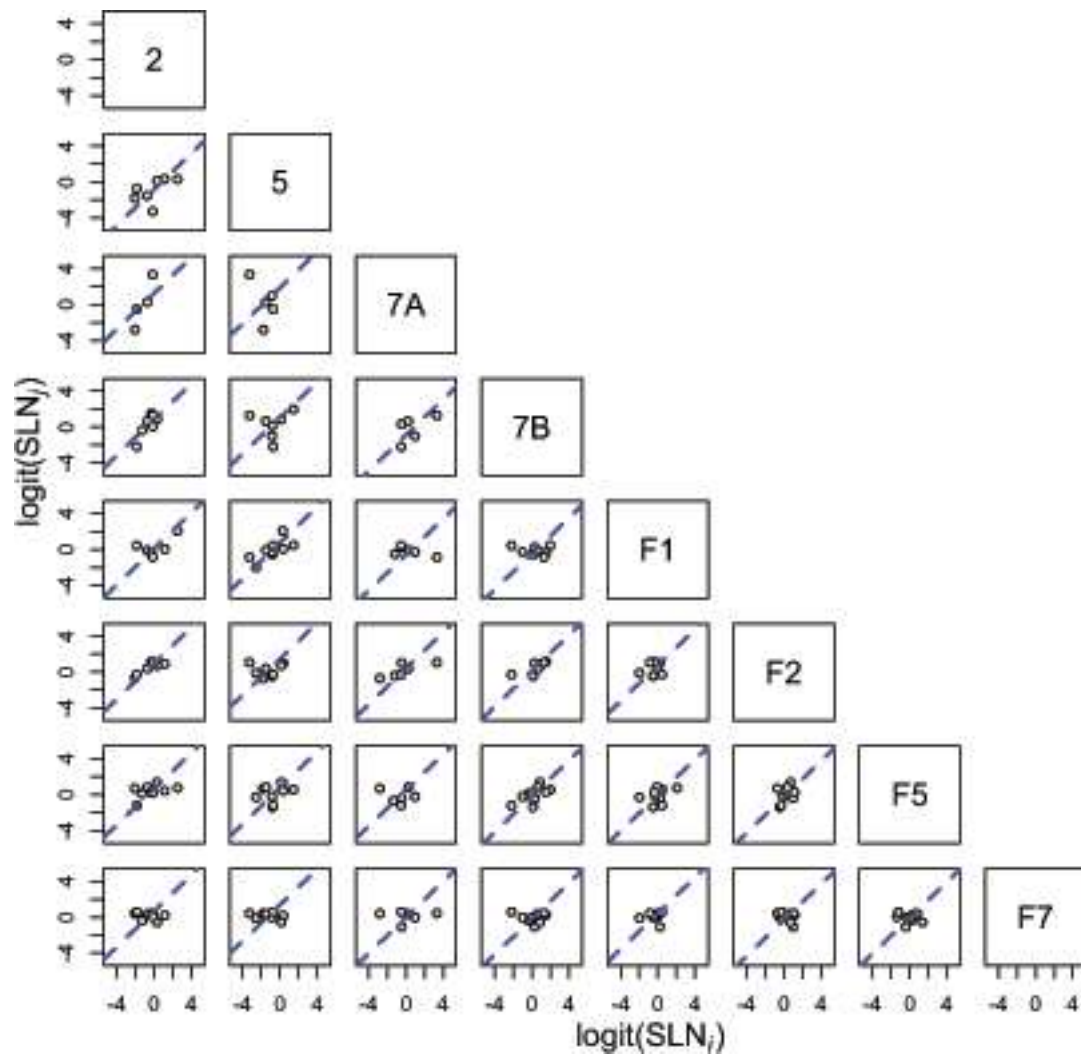

1382

1383

1384 **Figure 6. Logit transformation.** Scatter plots of logit transformed SLN values of common  
1385 source areas from pairs of 8 somatosensory and motor areas, obtained from retrograde tracer  
1386 injections. The plots follow the same format as in Figure 6 except that the SLN values from  
1387 each axis are transformed by the logit function. The dashed blue line in each plot is the best  
1388 fit line of unit slope.



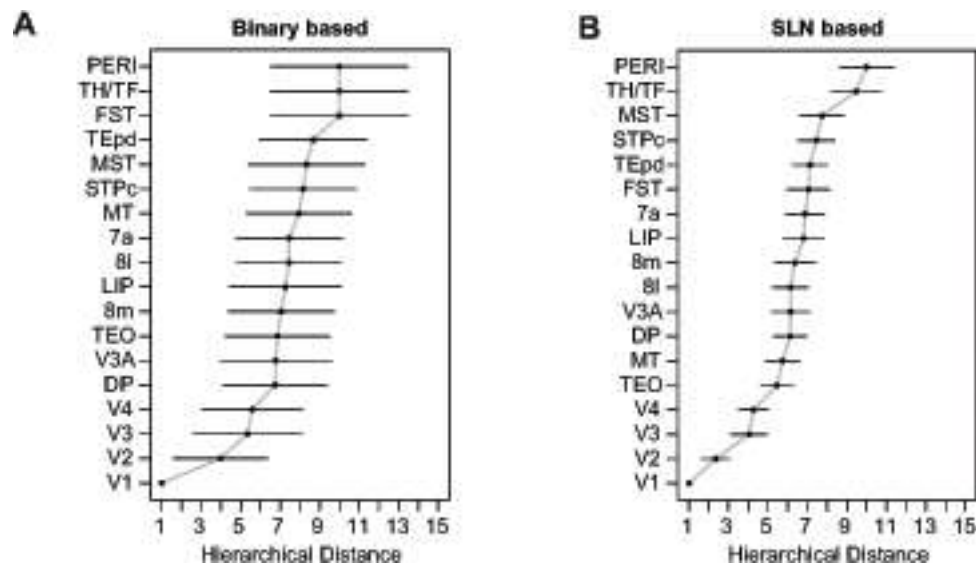

1389

1390

1391 **Figure 7. Precision of estimated hierarchy based on hierarchical index.** A. Estimated  
1392 hierarchy obtained using logit transformed SLN values as a measure of hierarchical distance.  
1393 The counts of supra- and infragranular neurons are used as weights. The error bars are 95%  
1394 confidence intervals estimated from the covariance matrix of the fitted model. B. Estimated  
1395 hierarchy using a binary variable as an indicator of the hierarchical relation between area  
1396 pairs. A logit link was also used in this case. The larger 95% confidence intervals  
1397 demonstrate the loss of precision in estimating the hierarchical distance when using only  
1398 binary information about connectivity.

1399

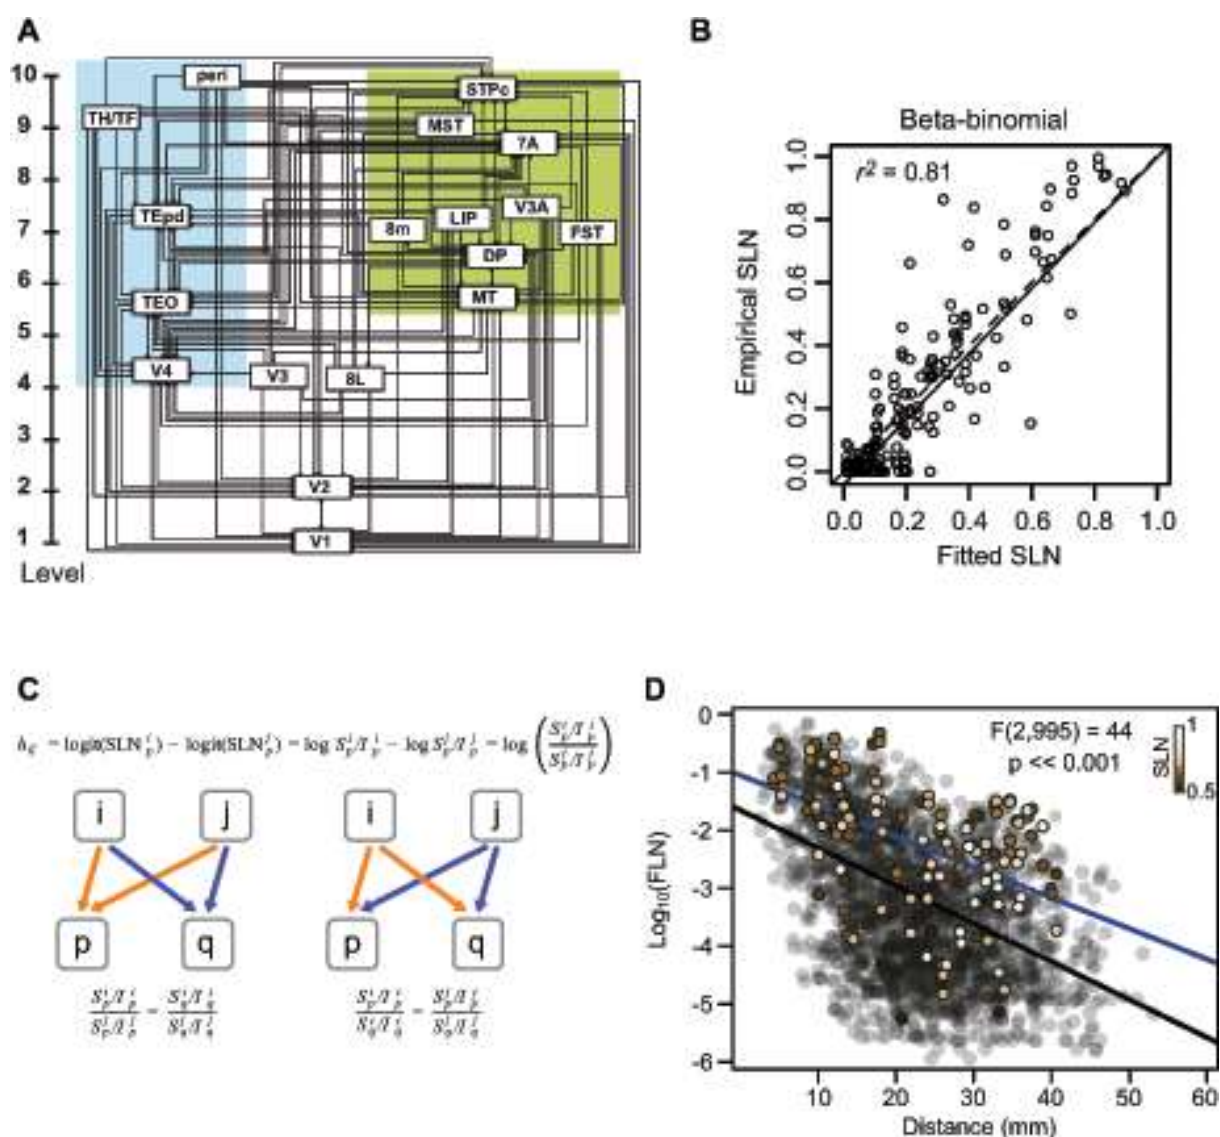

1400

1401

1402 **Figure 8. Hierarchical organization of visual areas (A) estimated from the beta-binomial**

1403 **model.** The model only provides the vertical level of the areas with respect to the lowest

1404 level. For clarity of presentation, we have separated them laterally into ventral and dorsal

1405 stream areas. The estimated values are only unique up to adding a constant and multiplying

1406 by a coefficient. Here, we have the areas to span the range 1-10. **B)** The scatter plot shows

1407 the empirical SLN values plotted against those predicted by the model. The solid line is the

1408 unit slope line through the origin and the dashed line is the best fit linear regression. **C)**

1409 **Hierarchical distance.** The hierarchical distance,  $h_{ij}$ , between common projections from

1410 areas  $i$  and  $j$  to area  $p$ , defined as the difference of logits of their SLN values, is equivalent to

1411 the log of the ratio of their supra- to infra-granular projection strengths to area  $p$ . a. This

1412 definition implies that the ratio between the laminar ratios of areas  $i$  and  $j$  to area  $p$  (orange

1413 arrows) is the same as that for any other target area  $q$  receiving projections from the same

1414 source areas (blue arrows), as formalized in the equation below the diagram. This is because  
1415 the hierarchical distance from  $i$  to  $j$  should be the same for injections in both areas  $p$  and  $q$ . b.  
1416 A rearrangement of the equation (below) implies, also, that the ratio between the laminar  
1417 ratios of projections from a common source area,  $i$ , to areas  $p$  and  $q$ , will be the same for any  
1418 other common source area,  $j$ , to the same target areas. **D) Cortical-cortical strong loops.** The  
1419 strength-distance relation of 1615 projections from 91 to 29 cortical areas obtained from  
1420 retrograde tracer injections. The transparent black points indicate all of the projections except  
1421 those that participate in strong-loops in beige. The color gradient on these symbols  
1422 corresponds to SLN strength as indicated by the inset color bar. The black line is the best fit  
1423 linear regression to the transparent black points and the blue line is the best fit to the strong-  
1424 loops. The F-statistic indicates the result of a nested likelihood test indicating the probability  
1425 of a difference in strength between the two sets of points as large as that obtained under the  
1426 null hypothesis that the true difference is zero, when physical distance via the WM is taken  
1427 into account.  
1428

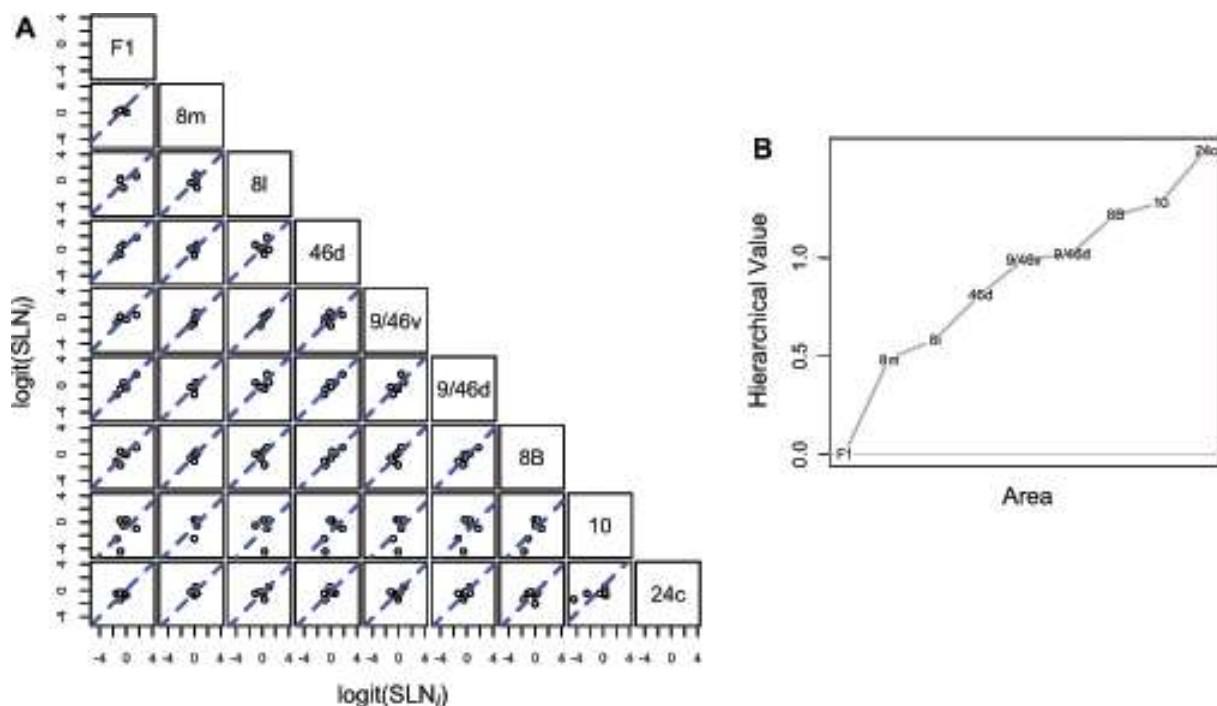

1429 **Figure 9. A)** Scatter plots of logit transformed SLN values of common source areas from  
1430 pairs of 9 frontal and pre-frontal areas, obtained from retrograde tracer injections. The plots  
1431 follow the same format as previous in Figures 6 and 7. The dashed blue line in each plot is the  
1432 best fit line of unit slope. **B)** Hierarchical scale values estimated for the 9 areas based on the  
1433 proposed statistical model. Area F1 was assigned a value of 0 for model identifiability.  
1434  
1435

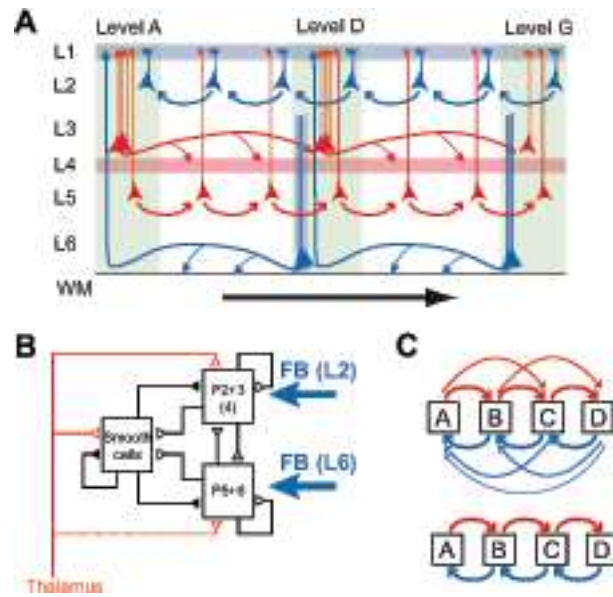

1436  
1437

1438 **Figure 10. Dual counterstream architecture of inter-areal pathways.** A) Parent neurons at  
1439 L3 and L5 have FF projections (red) to higher order areas reciprocated by FB projections  
1440 (blue) in L2 and the L6. Simultaneous tracer injections in high and low areas show that the  
1441 upper layer counterstream has near 100% segregation, i.e. the FF (FB) neurons do not send  
1442 axon collaterals to lower (higher) order areas. However the evidence that the FF and FB  
1443 pathways form continuous streams, as depicted here is indirect; what crucially remains to be  
1444 elucidated are the laminar details on the connectivity and the cellular targets. B) the canonical  
1445 microcircuit showing the two FB pathways targeting L2 and L6. Modified from (Douglas and  
1446 Martin, 1991); C) the incorrectly assumed serial processing (lower) between areas that is not  
1447 observed in the cortex, where instead each areas project to all upper and lower stream areas  
1448 (all to all). (panel A from (Markov et al., 2014b));

1449

1450

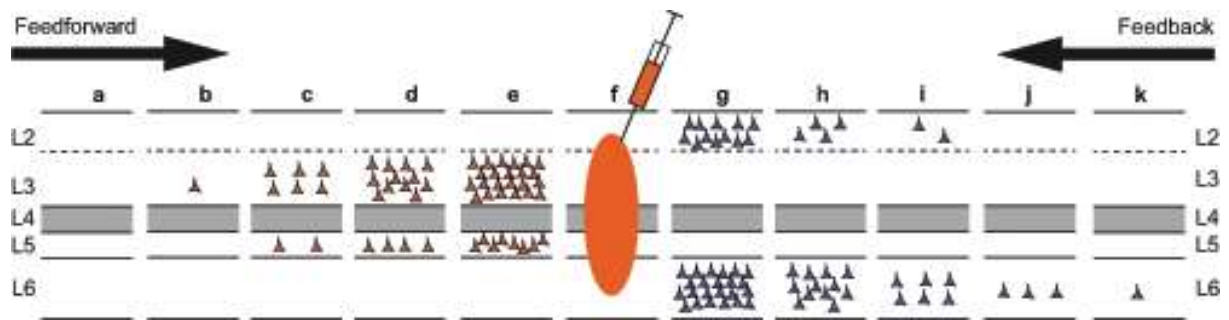

1451  
1452

1453 **Figure 11. Distance effects of labeling in individual layers.** This figure how FB projecting  
1454 neurons are differentially distributed in L2 and 6 and FF in L3 and 5. The characteristic SLN  
1455 gradient found in up- and down stream areas shown in figure 2 is due to different distance  
1456 rules operating in individual layers. Hence the short-distance spread of labeled neurons in L2  
1457 coupled with the long-distance spread in L6 leads to the observed decrease in SLN with  
1458 increasing FB hierarchical distances. Likewise the long-distance spread of labeled neurons in  
1459 L3 coupled with the short-distance spread in L5 leads to the observed increase in SLN with  
1460 increasing FF hierarchical distances.

1461  
1462

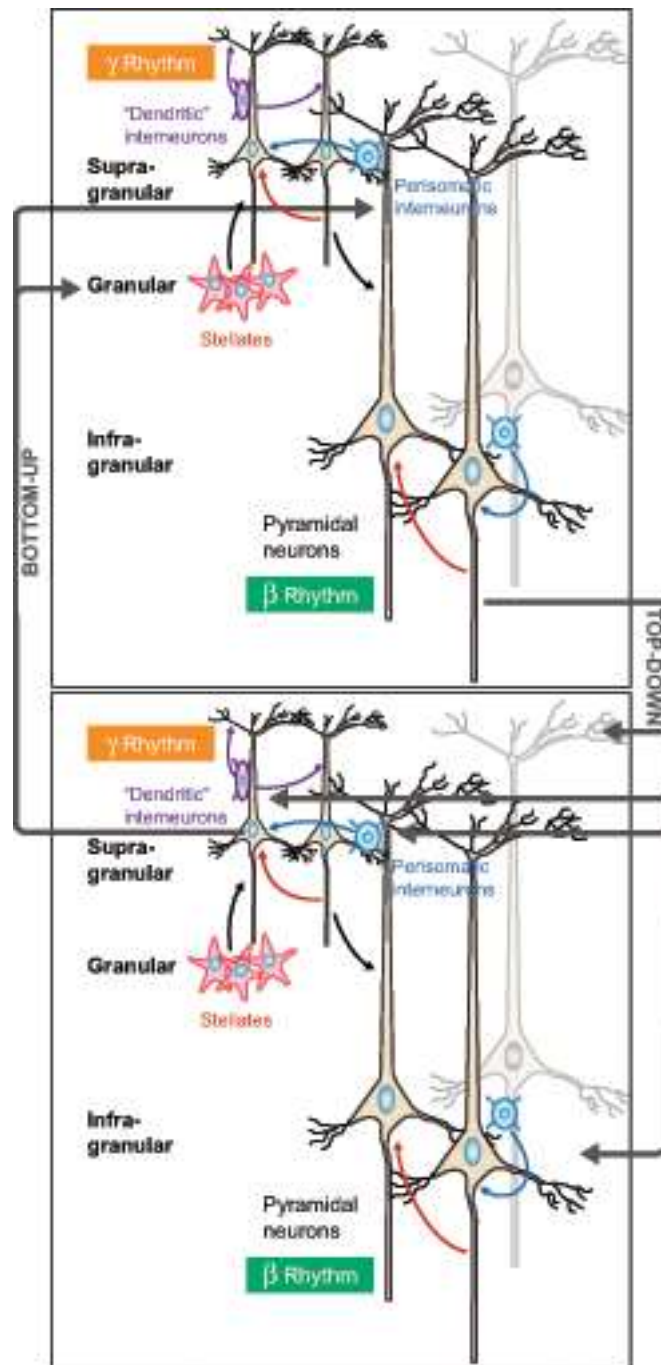

1463

1464

1465 **Figure 12. Schematic circuit for the interplay between bottom-up and top-down**

1466 **signaling characterized by differential frequency-band synchrony.** In a reciprocally

1467 connected loop between a sensory-type area and a cognitive-type area, neural circuits in the

1468 superficial layers are endowed with strong intrinsic synaptic connections and generate

1469 stochastic oscillations in the gamma frequency range, whereas the deep layers have a

1470 propensity to display slower oscillations in the lower beta or alpha frequency range. Top-

1471 down projections originate in the deep layers and innervate pyramidal cells (brown), as well

1472 as dendrite-targeting (purple) and perisoma-targeting (blue) inhibitory interneurons. In this

1473 scenario, low beta/alpha oscillations are directly involved in top-down signaling, which  
1474 interacts with locally generated gamma oscillations. Adopted with permission from Wang  
1475 (Wang, 2010).  
1476

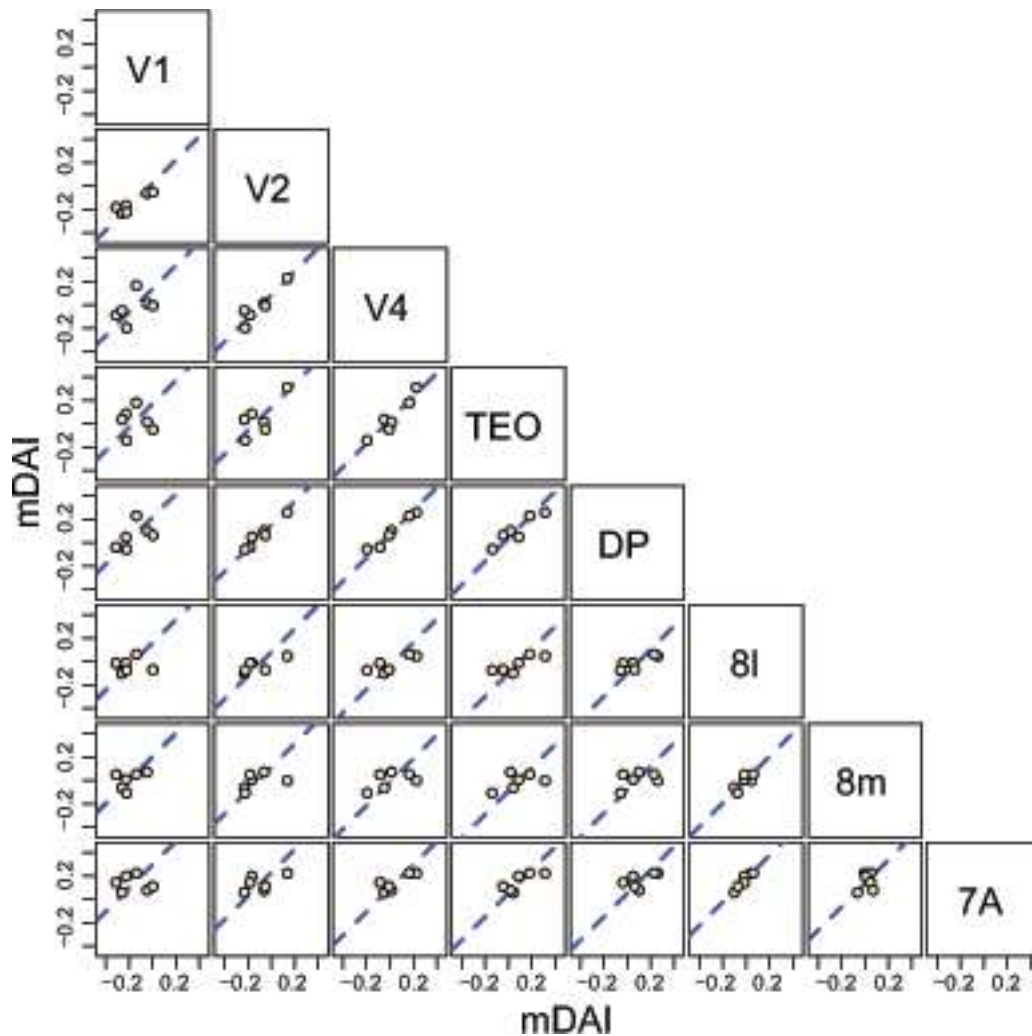

1477

1478

1479 **Figure 13.** Scatter plots of a hierarchical measure of cortical distance (mDAI) derived by  
1480 Bastos et al., 2015 of common source areas for pairs of 8 visual areas obtained from  
1481 contrasting Granger Causality measures in gamma, theta and beta bands. The abscissa of each  
1482 graph corresponds to the value calculated for the area at the top of the column and the  
1483 ordinate to the area at the right of the row. Dashed blue line in each plot is the best fit line of  
1484 unit slope.
